# Supplementary material for: Comprehensive Proteomic Analysis of Lysine Acetylation in Nicotiana benthamiana After Sensing CWMV Infection
Source: Front Microbiol. 2021 May 17;12:672559. doi: 10.3389/fmicb.2021.672559 (PMC8166574; doi:10.3389/fmicb.2021.672559)
Supplement: Supplementary file 6 [file Table_5.XLSX]

## Sheet: nodes
Table S5 network information of acetylated proteins
Name in links	Protein accession	Position	Amino acid	No.Sites	Regulated Type	Log2Ratio	Protein description	Gene name	Localization probability	PEP	Score	Modified sequence	Charge	Mass error [ppm]	MS/MS Count	CK1	CK2	CK3	CWMV_1	CWMV_2	CWMV_3	Ratio	P value	Name in String	MCODE_Cluster	MCODE_Node_Status	MCODE_Score
55	A0A140G1U0	39	K	2	Up	0.349365	50S ribosomal protein L20	rpl20	1	0.033123	54.191	TITQQK(1)IR	2	0.41104	1	0.895	0.914	0.887	1.179	1.08	1.176	1.274	0.00131949	XP_009759705.1	Cluster 1	Clustered	26.5034
135	A0A1S4CVZ3	617	K	5	Up	0.757023	"Elongation factor G, chloroplastic"	LOC107823197	1	0.00997634	54.486	SEIK(1)GGAVPK	2	-0.48984	1	0.753	0.753	0.788	1.245	1.39	1.243	1.69	0.000198	XP_009793831.1	Cluster 1	Clustered	23.5897
64	A0A140G1Y4	262	K	7	Up	0.659925	ribosomal protein L2	rpl2	1	0.00129782	76.255	NK(1)YSDNLILR	2	-0.52888	1	0.774	0.836	0.805	1.22	1.436	1.159	1.58	0.0026772	XP_009773352.1	Cluster 1	Clustered	29
18	A0A1S4CJ62	124	K	5	Up	0.609755	60S ribosomal protein L9-1-like	LOC107819630	1	0.0268151	82.426	NFLGEK(1)R	2	0.18712	1	0.723	0.746	0.918	1.272	1.306	1.065	1.526	0.0125813	XP_009775635.1	Cluster 1	Clustered	28.8246
43	A0A1S4DN09	117	K	2	Up	0.371838	"photosystem II repair protein PSB27-H1, chloroplastic-like"	LOC107831545	1	0.0444948	60.118	EK(1)ALLGR	2	0.30438	1	0.886	0.917	0.838	1.104	1.161	1.153	1.294	0.00108003	XP_009788089.1		Unclustered	10
189	A0A1S3ZIE1	195	K	6	Up	0.586885	"photosystem I reaction center subunit II, chloroplastic"	LOC107787208	1	2.05e-06	113.61	SPIEVK(1)FTGK	3	0.50745	6	0.828	0.782	0.887	1.206	1.33	1.214	1.502	0.00107906	XP_009795521.1	Cluster 2	Seed	16.1087
102	A0A1S4A0E0	78	K	5	Up	0.412511	"ATP synthase gamma chain, chloroplastic-like"	LOC107792409	1	4.28e-06	103.76	ITEAMK(1)LVAAAK	2	0.18571	1	0.9	0.878	0.892	1.218	1.194	1.143	1.331	0.000141	XP_009760449.1	Cluster 2	Clustered	13.2483
53	A0A1S4DLC0	927	K	3	Up	0.843984	"translation initiation factor IF-2, chloroplastic-like"	LOC107830987	1	3.93e-11	92.264	VAGCMVTEGK(1)VVEDCGIR	3	1.2542	1	0.736	0.872	0.67	1.419	1.438	1.231	1.795	0.00304	XP_009790742.1	Cluster 3	Clustered	11.7363
37	Q0PWS5	204	K	4	Up	0.552869	"Chlorophyll a-b binding protein, chloroplastic"	Lhcb5	1	2.09e-07	62.193	ITNGLDLEDK(1)LHPGGPFDPLGLAK	4	1.0855	1	0.855	0.9	0.807	1.179	1.291	1.289	1.467	0.000917	XP_009781366.1	Cluster 2	Clustered	14.7333
192	F2VJ75	357	K	2	Up	0.475085	Fructose-bisphosphate aldolase	LOC107797422	1	6.74e-09	77.959	TWGGQPENVK(1)AAQDALLTR	3	-2.5963	1	0.752	0.886	0.911	1.084	1.383	1.077	1.39	0.032743	XP_009766551.1	Cluster 3	Clustered	10.3235
214	A0A1S4CM79	368	K	3	Down	-0.277534	Malic enzyme	LOC107820287	1	0.00162342	83.862	K(1)IWLVDSK	3	-0.10384	3	1.17	1.144	1.133	0.958	0.968	0.917	0.825	0.000542	XP_009779848.1		Unclustered	4
52	A0A1S3XRM3	136	K	11	Up	0.659925	"oxygen-evolving enhancer protein 3-2, chloroplastic-like"	LOC107767928	1	0.00225271	67.997	DSAK(1)EIVSVK	2	0.36396	1	0.757	0.787	0.86	1.323	1.199	1.276	1.58	0.000642	XP_009791746.1	Cluster 2	Clustered	13.2874
177	A0A1S3YAU9	207	K	4	Up	0.714575	"Chlorophyll a-b binding protein, chloroplastic"	LOC107774251	1	0.00102629	89.047	NAELDPEK(1)R	3	0.67475	3	0.781	0.81	0.766	1.227	1.502	1.139	1.641	0.0043979	XP_009804550.1	Cluster 2	Clustered	13.9718
196	A0A1S3XC53	144	K	1	Up	0.40163	protein tas-like	LOC107763504	1	0.00816474	50.108	VILATK(1)VCGYSER	3	2.1092	1	0.794	1.021	0.798	1.106	1.15	1.197	1.321	0.029536	XP_009770016.1		Unclustered	7
31	A0A1S3XBF4	154	K	4	Up	0.669027	"protein plastid transcriptionally active 16, chloroplastic-like isoform X2"	LOC107763187	1	0.00851501	70.675	VISNDESK(1)R	2	-0.96201	2	0.776	0.846	0.811	1.281	1.316	1.271	1.59	6.39e-05	XP_009774336.1	Cluster 2	Clustered	15.2308
217	A0A1S4CS04	261	K	1	Up	0.381837	Glucose-6-phosphate 1-dehydrogenase	LOC107822069	1	0.00332343	74.237	K(1)YLTEEQIFR	2	2.4919	1	0.921	0.844	0.853	1.14	1.165	1.105	1.303	0.00109757	XP_009782232.1	Cluster 3	Clustered	10.6737
152	A0A1S4DK35	21	K	3	Up	0.316146	"triosephosphate isomerase, cytosolic isoform X2"	LOC107830628	1	5.08e-06	113.24	CNGTSEEVK(1)K	3	-0.20425	2	0.876	0.895	0.91	1.21	1.051	1.076	1.245	0.008461	XP_009793252.1	Cluster 3	Clustered	11.8713
115	Q0PWS6	229	K	3	Up	0.549916	"Chlorophyll a-b binding protein, chloroplastic"	Lhcb6	1	3.34e-07	126.62	VAEIK(1)HAR	3	0.36242	5	0.888	0.867	0.78	1.244	1.26	1.206	1.464	0.000801	XP_009770890.1	Cluster 2	Clustered	15.6738
71	A0A1S4CLL3	161	K	3	Up	0.634129	"protein CURVATURE THYLAKOID 1A, chloroplastic-like"	LOC107820363	1	1.21e-09	119.27	ELAEDIEQLK(1)K	3	-0.3948	2	0.781	0.822	0.809	1.273	1.244	1.227	1.552	1.94e-05	XP_009772587.1	Cluster 2	Clustered	13.3766
66	A0A1S3X2Z0	183	K	7	Up	0.434028	"triosephosphate isomerase, chloroplastic-like"	LOC107760622	1	2.51e-40	169.04	RHVIGENDEFIGK(1)K	4	1.0354	6	0.84	0.89	0.876	1.065	1.279	1.178	1.351	0.0058249	XP_009788094.1	Cluster 3	Clustered	11.8713
22	A0A1S3YV19	183	K	10	Up	0.324235	Glyceraldehyde-3-phosphate dehydrogenase	LOC107780142	1	0.00224431	89.171	K(1)VLITAPGK	2	-0.013369	4	0.893	0.933	0.869	1.005	1.26	1.108	1.252	0.032555	XP_009800449.1	Cluster 3	Clustered	12.7027
50	A0A1S3ZLI9	152	K	17	Up	0.324235	60S ribosomal protein L3	LOC107788247	1	0.000324	89.189	DIQTQLEK(1)LK	2	-0.23318	2	0.853	0.885	0.918	1.015	1.193	1.116	1.252	0.012381	XP_009786904.1	Cluster 1	Clustered	28.8246
207	A0A1S4DJH3	211	K	2	Up	0.375178	Ribosomal protein	LOC107830403	1	0.0111707	71.614	STMGK(1)TQR	2	-0.27592	1	0.746	0.961	0.833	0.993	1.123	1.179	1.297	0.042221	XP_009795842.1	Cluster 1	Clustered	28.8246
65	Q84QE8	152	K	8	Up	0.608809	Oxygen evolving complex 33 kDa photosystem II protein	PsbO	1	3e-05	73.834	AESVNK(1)NAPPDFQK	3	-3.1152	1	0.801	0.883	0.798	1.284	1.272	1.23	1.525	0.000284	XP_009768511.1	Cluster 2	Clustered	13.3655
17	A0A1S4D519	124	K	1	Up	0.271426	"LOW QUALITY PROTEIN: UPF0603 protein At1g54780, chloroplastic"	LOC107826018	1	0.0406618	61.78	VTK(1)SDLK	2	-0.12141	1	0.9	0.961	0.863	1.087	1.143	1.058	1.207	0.0081396	XP_009773598.1	Cluster 2	Clustered	14.5379
47	A0A1S4DBQ6	65	K	9	Up	0.432959	Glyceraldehyde-3-phosphate dehydrogenase	LOC107828122	1	1.78e-17	146.36	HHELK(1)VK	2	-0.05795	20	0.828	0.811	0.867	1.133	1.167	1.084	1.35	0.0005	XP_009780356.1	Cluster 3	Clustered	10.3235
91	A0A1S4DJD1	75	K	8	Up	0.397255	Phosphoribulokinase	LOC107830375	1	4.68e-28	142.72	TVVIGLAADSGCGK(1)STFMR	3	-0.8913	3	0.776	0.987	0.863	1.218	1.131	1.11	1.317	0.020462	XP_009783382.1	Cluster 3	Clustered	12.2915
195	A0A1S4AX40	213	K	2	Up	0.709291	"ATP synthase subunit b', chloroplastic-like"	LOC107802241	1	2.85e-12	117.18	SLDSQIAALSDEIVK(1)K	3	-0.25515	2	0.773	0.815	0.762	1.214	1.331	1.298	1.635	0.000138	XP_009774823.1		Unclustered	8.85714
84	A0A1S4DPM5	130	K	2	Up	0.571434	60S ribosomal protein L26-1-like	LOC107831809	1	0.0408688	50.966	AAADK(1)DK	3	-1.0375	1	0.814	0.83	0.812	1.418	1.134	1.098	1.486	0.040339	XP_009770504.1	Cluster 1	Clustered	28.8246
5	P30155	121	K	3	Up	0.607863	"50S ribosomal protein L27, chloroplastic"	RPL27	1	0.0319195	54.539	FEK(1)FGPDR	2	-0.59451	1	0.877	0.867	0.751	1.297	1.423	1.082	1.524	0.0116183	XP_009784304.1	Cluster 1	Clustered	25.2172
14	A0A1S3XWU9	115	K	4	Up	0.334568	"oxygen-evolving enhancer protein 2-1, chloroplastic-like"	LOC107769475	1	1.58e-10	127.56	LQVPAK(1)WNPSK	2	0.0514	2	0.923	0.912	0.913	1.219	1.189	1.056	1.261	0.035482	XP_009765610.1	Cluster 2	Clustered	14.6691
2	A0A1S3YEX0	244	K	9	Up	0.553852	"sedoheptulose-1,7-bisphosphatase, chloroplastic-like"	LOC107775549	1	1.86e-75	195.97	DVPGTHEFLLLDEGK(1)WQHVK	5	0.039004	4	0.826	0.85	0.847	1.252	1.249	1.203	1.468	1.84e-05	XP_009776701.1	Cluster 2	Clustered	15.6863
185	A0A1S3WZB9	891	K	3	Up	0.789938	phosphoenolpyruvate carboxylase 4-like	LOC107759530	1	0.00296844	45.916	ADIPIAK(1)HYDDVLVSETR	3	4.1379	1	0.808	0.786	0.75	1.432	1.278	1.343	1.729	0.000159	XP_009762235.1		Unclustered	3.42857
11	A0A1S4D9F1	308	K	6	Up	0.467801	Pyruvate kinase	LOC107827388	1	0.00173556	63.185	CNMAGK(1)PAVVTR	2	-0.79018	1	0.81	0.881	0.813	1.037	1.298	1.129	1.383	0.0106225	XP_009787072.1		Unclustered	9.53333
162	A0A1S4C2S1	259	K	9	Up	0.533065	40S ribosomal protein S2-3-like	LOC107814537	1	0.000226	58.246	SPFQEYADILSK(1)PANK	4	0.90175	2	0.746	0.874	0.805	1.077	1.392	1.04	1.447	0.024115	XP_009797071.1	Cluster 1	Clustered	28.8246
1	A0A1S4CCH0	13	K	2	Up	0.343692	60S ribosomal protein L17-1-like	LOC107817504	1	0.0016239	73.435	EPDNPTK(1)SCK	3	0.55067	4	0.96	0.815	0.883	1.161	1.208	1.005	1.269	0.031477	XP_009803114.1	Cluster 1	Clustered	28.8246
6	A0A1S4BKP7	145	K	1	Up	0.707525	"30S ribosomal protein 3, chloroplastic-like"	LOC107809317	1	0.000337	71.806	TTLESK(1)PWISQK	3	0.80516	1	0.829	0.78	0.757	1.301	1.286	1.276	1.633	5.82e-05	XP_009761787.1		Unclustered	1.66667
157	P30956	100	K	6	Up	0.425459	"50S ribosomal protein L28, chloroplastic"	RPL28	1	3.4e-12	128.81	K(1)LQFVNLQYK	2	-1.1638	2	0.928	0.816	0.85	1.067	1.243	1.174	1.343	0.0073199	XP_009795876.1	Cluster 1	Clustered	26.5034
70	A0A1S3YQ87	182	K	3	Up	0.350497	"photosystem II 22 kDa protein, chloroplastic"	LOC107778533	1	0.000163	93.649	AVIPPGK(1)GFK	3	0.047015	13	0.885	0.929	0.907	1.089	1.2	1.181	1.275	0.00185986	XP_009771859.1		Unclustered	6.87179
110	A0A1S3X7H4	106	K	6	Up	0.564622	40S ribosomal protein S16-like	LOC107762148	1	0.0046088	82.279	YVDEQSK(1)K	2	-1.0629	2	0.702	0.825	0.883	1.128	1.352	1.085	1.479	0.0151572	XP_009764504.1	Cluster 1	Clustered	28.8246
179	A0A1S4AS05	6	K	3	Up	0.413594	40S ribosomal protein S28	LOC107800747	1	0.000616	64.121	MESATK(1)HAIVVK	3	1.493	1	0.878	0.831	0.833	1.094	1.113	1.178	1.332	0.000563	XP_009769489.1	Cluster 1	Clustered	28.8246
109	P68158	328	K	4	Up	0.321928	"Elongation factor Tu, chloroplastic"	TUFA	1	1.91e-10	117	IGDTVDIVGLK(1)DTR	2	-0.1938	2	0.885	0.927	0.863	1.095	1.036	1.213	1.25	0.0120003	XP_009779094.1	Cluster 1	Clustered	25.5517
34	A0A1S3ZP89	166	K	1	Up	0.753605	"30S ribosomal protein S9, chloroplastic-like"	LOC107788887	1	0.00141392	66.758	ALLK(1)VSESHR	3	0.17186	1	0.841	0.661	0.783	1.096	1.58	1.177	1.686	0.017904	XP_009797455.1	Cluster 1	Clustered	26.5034
80	A0A1S4C8L1	78	K	3	Down	-0.599462	40S ribosomal protein S18-like	LOC107816127	1	7.76e-07	113.22	QFK(1)IPDWFLNR	3	-0.1448	1	1.251	1.284	1.24	0.805	0.849	0.839	0.66	2.36e-05	XP_009784270.1	Cluster 1	Clustered	28.8246
166	A0A140G1V4	98	K	2	Up	0.809826	ribosomal protein L16	rpl16	1	0.0114695	49.724	GSPEYWVAVVK(1)PGR	2	3.3783	1	0.72	0.791	0.753	1.418	1.236	1.314	1.753	0.000316	XP_009762881.1		Unclustered	22.1404
97	A0A1S4AIZ0	211	K	12	Up	0.592636	Phosphoglycerate kinase	LOC107798205	1	6.73e-13	102.39	K(1)LASLADLYVNDAFGTAHR	3	-0.68983	2	0.698	0.929	0.771	1.252	1.322	1.041	1.508	0.02036	XP_009763674.1	Cluster 2	Clustered	15.6863
165	A0A1S3YR78	275	K	4	Up	0.369606	Pyruvate kinase	LOC107778911	1	6.11e-11	94.339	GDLGMEIPVEK(1)IFLAQK	3	0.78358	2	0.87	0.933	0.871	1.12	1.123	1.213	1.292	0.00182468	XP_009785561.1	Cluster 3	Clustered	10.3235
81	A0A1S3YIG1	268	K	1	Up	0.604071	enolase-like	LOC107776643	1	0.000723	53.565	SYDLNFK(1)EENNDGSQK	4	0.31992	1	0.759	0.852	0.736	1.131	1.392	1.044	1.52	0.012884	XP_009764205.1	Cluster 2	Clustered	13.7905
139	A0A1S4DPF3	275	K	7	Up	0.441483	"phosphoglucomutase, cytoplasmic"	LOC107832007	1	5.23e-06	58.952	EDFGGGHPDPNLTYAK(1)ELVAR	3	-0.21716	1	0.822	0.805	0.942	1.106	1.225	1.158	1.358	0.0058627	XP_009783550.1	Cluster 4	Clustered	6.5641
44	A0A1S3YPD8	118	K	2	Down	-0.597278	"peroxiredoxin Q, chloroplastic-like"	LOC107778186	1	0.0102768	87.476	DSYEK(1)FK	3	0.54143	3	1.275	1.274	1.219	0.92	0.697	0.875	0.661	0.0083429	XP_009767565.1	Cluster 2	Clustered	14.7794
23	A0A1S3YUQ9	397	K	9	Up	0.795767	"chloroplast stem-loop binding protein of 41 kDa a, chloroplastic-like"	LOC107779757	1	0.00504878	57.347	ILEALK(1)VPVAA	2	0.20391	1	0.822	0.83	0.63	1.331	1.358	1.273	1.736	0.0037551	XP_009796265.1	Cluster 2	Clustered	15.6863
143	A0A1S4C4L0	341	K	4	Up	0.715454	GTP-binding protein TypA/BipA homolog	LOC107815102	1	0.00185474	57.434	VSELFVYEK(1)FSR	3	-0.64453	1	0.865	0.672	0.843	1.28	1.397	1.23	1.642	0.0048369	XP_009767683.1		Unclustered	9
56	A0A1S3XP71	129	K	10	Up	0.440421	Glyceraldehyde-3-phosphate dehydrogenase	LOC107767301	1	1.4e-17	133.86	NASHLLK(1)YDSMLGTFK	3	0.55436	7	0.908	0.853	0.866	1.202	1.209	1.154	1.357	0.000217	XP_009780936.1		Unclustered	7.28629
182	A0A1S3ZYP6	800	K	7	Up	1.47197	"magnesium-chelatase subunit ChlH, chloroplastic-like"	LOC107791852	1	0.00338216	55.261	VYSK(1)IMEIESR	3	-0.62855	1	0.621	0.774	0.538	1.558	1.88	1.925	2.774	0.0012002	XP_009793484.1	Cluster 3	Clustered	10.3956
204	A0A1S4D5C4	14	K	7	Up	0.413594	60S ribosomal protein L7-2-like	LOC107826102	1	6.2e-06	98.592	GEGGVPVPESVLK(1)K	3	-0.017995	1	0.863	0.846	0.897	1.19	1.231	1.051	1.332	0.0050435	XP_009780830.1	Cluster 1	Clustered	28.8246
200	A0A1S3ZXI6	101	K	6	Up	0.420078	40S ribosomal protein S24	LOC107791538	1	0.00140465	79.148	NGLDTK(1)VEK	2	-1.0406	2	0.836	0.84	0.847	1.12	1.141	1.115	1.338	1.72e-06	XP_009789454.1	Cluster 1	Clustered	28.8246
86	O80360	105	K	3	Up	0.596458	"50S ribosomal protein L3, chloroplastic (Fragment)"	RPL3	1	0.00187859	62.454	LTK(1)PEMGHLEK	3	-0.1434	1	0.9	0.805	0.725	1.143	1.314	1.218	1.512	0.005	XP_009794197.1	Cluster 1	Clustered	23.2615
149	A0A1S3XSR0	217	K	3	Up	0.37629	"50S ribosomal protein L15, chloroplastic-like"	LOC107768370	1	7.6e-25	152.01	EK(1)LEAAGCSLTVLPGRK	4	0.24637	4	0.847	0.885	0.952	1.065	1.243	1.177	1.298	0.010076	XP_009803210.1	Cluster 1	Clustered	23.2615
129	A0A1S3ZDI1	582	K	11	Up	0.427606	"transketolase, chloroplastic-like"	LOC107785488	1	2.22e-07	72.433	PADGNETAGAYK(1)VAVLK	3	-0.18474	1	0.862	0.836	0.865	1.096	1.277	1.073	1.345	0.0063205	XP_009781082.1	Cluster 3	Clustered	11.6
175	A0A1S4DRP6	281	K	2	Up	0.495695	transaldolase-like	LOC107832738	1	0.000179	83.862	AYNYIHK(1)YGHK	4	0.027787	2	0.83	0.911	0.757	1.088	1.287	1.147	1.41	0.0091977	XP_009788658.1	Cluster 3	Clustered	12.5974
8	A0A1S3YQS9	243	K	6	Up	0.573375	"malate dehydrogenase [NADP], chloroplastic-like isoform X1"	LOC107778629	1	5.77e-07	78.69	NAPNIPAK(1)NFHALTR	3	-1.2672	2	0.958	0.727	0.754	1.179	1.16	1.29	1.488	0.0120571	XP_009771990.1	Cluster 3	Clustered	12.7524
170	A0A1S4CBW5	213	K	1	Up	0.929033	"Chlorophyll a-b binding protein, chloroplastic"	LOC107817323	1	2.31e-18	85.423	GLGGSGDPAYPGGPFFNPLGFGK(1)DEK	4	-0.88906	2	0.768	0.736	0.696	1.12	1.798	1.27	1.904	0.0124387	XP_009778440.1	Cluster 3	Clustered	11.2211
57	A0A1S3ZHB8	160	K	5	Up	0.324235	"oxygen-evolving enhancer protein 1, chloroplastic-like"	LOC107786842	1	0.000507	81.017	NAPPEFQK(1)TK	3	-0.011258	4	0.901	0.933	0.92	1.213	1.213	1.021	1.252	0.019197	XP_009759927.1	Cluster 2	Clustered	13.3655
24	A0A1S4D910	181	K	2	Up	0.283329	"peptidyl-prolyl cis-trans isomerase CYP38, chloroplastic-like"	LOC107827288	1	0.000191	76.868	SK(1)ADHGVELLNK	3	2.238	1	0.962	0.85	0.895	0.981	1.191	1.122	1.217	0.0454	XP_009790146.1	Cluster 2	Clustered	14.1754
181	A0A1S4B7M6	126	K	5	Down	-0.547932	T-complex protein 1 subunit zeta 1	LOC107805339	1	0.00852393	53.013	VLVDGFEIAK(1)R	3	-0.85248	1	1.126	1.362	1.158	0.755	0.982	0.758	0.684	0.0219	XP_009758391.1		Unclustered	6
136	A0A1S4DNT1	267	K	2	Up	0.27739	Eukaryotic translation initiation factor 3 subunit I	LOC107831796	1	0.0503292	57.59	AGK(1)FEAK	2	3.0492	1	0.906	0.905	0.873	1.09	1.044	1.118	1.212	0.00121574	XP_009777665.1	Cluster 1	Clustered	27
93	A0A1S3Z846	17	K	1	Down	-0.388355	Ribosomal protein	LOC107784026	1	5.55e-22	143.42	EAITVIK(1)SASNEK	3	0.018606	1	1.171	1.231	1.146	0.831	0.99	0.888	0.764	0.0079187	XP_009774981.1	Cluster 1	Clustered	28.8246
132	A0A1S4CQ81	125	K	3	Up	0.516015	2-methylene-furan-3-one reductase-like	LOC107821492	1	6.06e-05	99.669	VVAAALNPVDFK(1)R	2	-0.85208	2	0.817	0.868	0.85	1.15	1.25	1.225	1.43	0.000317	XP_009762380.1	Cluster 2	Clustered	14.381
89	A0A1S3Y8V8	148	K	1	Up	0.602172	"glutathione S-transferase DHAR3, chloroplastic"	LOC107773610	1	0.00154138	67.997	ISPEGK(1)VPLIK	2	-1.3021	1	0.767	0.797	0.81	1.269	1.208	1.126	1.518	0.000403	XP_009796772.1		Unclustered	3
180	A0A1S4AVP7	78	K	7	Up	0.6107	60S ribosomal protein L44	LOC107801799	0.999942	1.11e-05	66.436	LQCQGCK(1)HVSQHPIKR	4	0.084924	1	0.834	0.723	0.792	1.194	1.235	1.158	1.527	0.000743	XP_009801249.1	Cluster 1	Clustered	28.8246
186	A0A1S4DGM0	345	K	1	Up	0.319618	Fructose-bisphosphate aldolase	LOC107829473	1	1.47e-64	168.55	ALQNTCLK(1)TWGGRPENVQAAQEALLVR	4	-0.86518	7	0.919	0.966	0.876	1.128	1.216	1.103	1.248	0.0055641	XP_009761015.1	Cluster 3	Clustered	10.3235
164	A0A1S4BT88	25	K	3	Up	0.635058	Glucose-6-phosphate isomerase	LOC107811651	1	0.000149	77.062	AHVEDINK(1)THLR	2	-0.41689	3	0.766	0.706	0.835	1.185	1.193	1.204	1.553	0.0118963	XP_009775388.1	Cluster 2	Clustered	13.7905
144	A0A1S4DL23	195	K	1	Up	0.582074	"lycopene epsilon cyclase, chloroplastic-like"	LOC107830918	1	0.000822	68.847	HLLHEELLK(1)R	4	-0.028424	1	0.923	0.823	0.751	1.373	1.251	1.113	1.497	0.0090757	XP_009779493.1		Unclustered	4.7619
49	A0A1S4CLZ9	399	K	3	Up	0.682573	Elongation factor Tu	LOC107820323	1	0.00626669	57.347	FEALVYVLK(1)K	3	-0.21366	1	0.701	0.844	0.84	1.083	1.47	1.275	1.605	0.0119779	XP_009772722.1	Cluster 1	Clustered	25.5517
26	A0A1S3XEF3	780	K	4	Up	0.313826	"Alpha-1,4 glucan phosphorylase"	LOC107764127	1	2.58e-17	133.34	MSILSTAGSGK(1)FSSDR	2	0.052748	3	0.872	0.916	0.895	1.023	1.207	1.104	1.243	0.0125002	XP_009763198.1	Cluster 4	Clustered	6.37778
28	A0A1S4AR72	101	K	3	Up	0.539035	Uroporphyrinogen decarboxylase	LOC107800512	0.951783	0.0209814	46.844	K(0.048)LAEK(0.952)HPSFR	4	-0.74847	1	0.863	0.959	0.687	1.203	1.077	1.365	1.453	0.034357	XP_009770168.1		Unclustered	1.66667
83	A0A1S4AHU7	188	K	1	Up	0.666302	"30S ribosomal protein 2, chloroplastic-like"	LOC107797860	1	4.18e-09	103.79	VYVGNLAK(1)NVTSESLK	3	1.4285	1	0.759	0.838	0.882	1.436	1.344	1.154	1.587	0.0042049	XP_009798565.1	Cluster 2	Clustered	13.7667
58	A0A1S3X6W9	207	K	1	Up	0.283329	Pyrophosphate--fructose 6-phosphate 1-phosphotransferase subunit alpha	LOC107761890	1	0.00365877	72.152	FAEAK(1)CPTK	2	-0.40441	2	0.924	0.906	0.85	1.027	1.128	1.106	1.217	0.0067576	XP_009777872.1		Unclustered	7.71429
215	A0A1S4C596	41	K	2	Down	-0.341903	ERBB-3 BINDING PROTEIN 1	LOC107815326	1	0.0145865	47.712	ALQLVLSECK(1)PK	3	2.5523	1	1.216	1.174	1.362	0.937	1.015	1.007	0.789	0.0101799	XP_009773246.1		Unclustered	20
42	Q8LSZ2	387	K	7	Up	0.698663	NADPH-protochlorophyllide oxidoreductase	POR2	1	0.0224051	56.258	K(1)LWEVSEK	3	0.66284	1	0.695	0.76	0.943	1.266	1.457	1.17	1.623	0.0116605	XP_009797445.1		Unclustered	4
117	A0A140G1S2	167	K	5	Up	0.367371	ATP synthase subunit beta	atpB	1	1.18e-05	84.297	GGK(1)IGLFGGAGVGK	3	0.23048	2	0.858	0.986	0.84	1.173	1.212	1.078	1.29	0.013842	XP_009780347.1		Unclustered	2.62821
46	A0A1S3YUH0	278	K	12	Up	0.602172	60S ribosomal protein L4-1-like	LOC107779688	0.987938	3.66e-07	84.508	LDEIYGSFDK(0.012)PSEK(0.988)K	4	-2.1312	1	0.77	0.655	0.903	1.216	1.201	1.118	1.518	0.0115217	XP_009801549.1	Cluster 1	Clustered	28.8246
150	A0A1S3ZAM9	300	K	5	Up	0.763836	"fructose-1,6-bisphosphatase, chloroplastic-like"	LOC107784747	1	2.03e-21	139.08	IYSFNEGNYQLWDDK(1)LK	3	-0.58687	2	0.795	0.808	0.766	1.321	1.397	1.304	1.698	3.83e-05	XP_009783757.1	Cluster 3	Clustered	12.8091
3	A0A1S3ZUC8	236	K	2	Up	0.626673	"rhodanese-like domain-containing protein 4, chloroplastic"	LOC107790570	1	8.66e-05	83.869	AAYAIK(1)DGAEGPR	2	-0.084162	2	0.71	0.867	0.885	1.339	1.151	1.311	1.544	0.0067038	XP_009789972.1	Cluster 3	Clustered	12.3
198	A0A1S4CSN1	80	K	7	Up	0.418999	60S ribosomal protein L13	LOC107822051	1	0.00017	65.043	GFSLEELK(1)AAGIPK	3	-2.8093	1	0.802	0.996	0.768	1.002	1.203	1.226	1.337	0.046584	XP_009773597.1	Cluster 1	Clustered	28.8246
194	A0A1S4BKW8	134	K	5	Up	0.745022	Ribosomal protein	LOC107809424	1	0.00016	70.889	TAIELLK(1)TTASTK	3	0.044404	1	0.807	0.734	0.769	1.084	1.46	1.327	1.676	0.0051845	XP_009787982.1	Cluster 1	Clustered	26.867
51	D2K7Z2	137	K	1	Up	0.550901	Photosystem I reaction center subunit	PsaN	1	0.000275	60.549	FPENFTGCQDLAK(1)QK	3	0.21464	1	0.803	0.844	0.874	1.202	1.327	1.164	1.465	0.0012041	XP_009772436.1	Cluster 2	Clustered	13.1621
202	A0A1S4B4M6	736	K	2	Up	0.382944	26S proteasome non-ATPase regulatory subunit 1 homolog	LOC107804491	1	0.000182	77.185	IVLDK(1)HEDTMSK	3	-2.34	2	0.906	0.858	0.796	0.966	1.242	1.13	1.304	0.033679	XP_009764531.1	Cluster 6	Clustered	2.7
101	A0A1S4CQQ3	257	K	5	Up	0.530071	"thylakoid lumenal 29 kDa protein, chloroplastic-like"	LOC107821470	0.809444	0.0396968	41.242	DK(0.191)FK(0.809)AVGFGPR	3	1.0426	1	0.819	0.884	0.8	1.23	1.185	1.2	1.444	0.000324	XP_009804172.1	Cluster 2	Clustered	14.7794
79	A0A1S3Z8U8	17	K	5	Up	0.627607	Fructose-bisphosphate aldolase	LOC107784214	1	0.00210991	64.82	NAK(1)YIATPGK	3	1.7733	1	0.781	0.789	0.846	1.256	1.323	1.154	1.545	0.000765	XP_009799651.1	Cluster 3	Clustered	10.3235
159	A0A1S4DJ63	74	K	5	Up	0.458382	phosphoenolpyruvate carboxylase-like	LOC107830408	1	0.0238902	49.356	HDPQK(1)LEELGR	2	-1.8664	1	0.843	0.773	0.986	1.241	1.274	1.06	1.374	0.025056	XP_009795584.1		Unclustered	3.42857
123	A0A1S3Z462	198	K	9	Up	0.644318	60S ribosomal protein L10	LOC107782598	1	1.36e-07	86.497	IVPDGVNAK(1)LLGCHGR	3	-0.69267	2	0.765	0.795	0.777	1.185	1.191	1.277	1.563	7.69e-05	XP_009793501.1	Cluster 1	Clustered	28.8246
36	A0A1S3ZPG2	377	K	2	Down	-0.436354	Glucose-6-phosphate isomerase	LOC107788918	1	1.02e-07	94.203	DMVVLPYK(1)DSLLLFSR	3	-0.039534	1	1.164	1.401	1	0.941	0.817	0.876	0.739	0.049344	XP_009770115.1	Cluster 2	Clustered	13.7905
178	A0A1S4AKW3	208	K	13	Up	1.01507	"ribulose bisphosphate carboxylase/oxygenase activase 2, chloroplastic-like"	LOC107798764	1	9.16e-36	116.7	MGINPIMMSAGELESGNAGEPAK(1)LIR	4	0.5621	3	0.69	0.693	0.695	1.309	1.474	1.416	2.021	0.0024623	XP_009760925.1	Cluster 2	Clustered	13.971
206	A0A1S3X073	95	K	1	Up	0.71721	"phosphoglycolate phosphatase 1B, chloroplastic-like"	LOC107759700	1	1.12e-07	93.226	GDK(1)LIDGVPETLDLLR	3	0.18158	3	0.74	0.802	0.823	1.219	1.458	1.211	1.644	0.001979	XP_009764455.1	Cluster 3	Seed	12.8538
103	A0A1S4DNF2	418	K	9	Up	0.365133	"2,3-bisphosphoglycerate-independent phosphoglycerate mutase-like"	LOC107831677	1	2.12e-08	116.03	DAILSGK(1)FDQVR	3	-0.28595	1	0.921	0.855	0.853	1.134	1.175	1.077	1.288	0.0020843	XP_009765604.1	Cluster 3	Clustered	10.3235
169	A0A1S4A6K0	114	K	4	Down	-0.477944	60S ribosomal protein L31-like	LOC107794303	1	0.0235709	49.448	GLGTK(1)IIEDED	2	-0.60455	1	1.245	1.08	1.222	0.769	0.844	0.935	0.718	0.0099193	XP_009757997.1	Cluster 1	Clustered	28.8246
29	A0A1S4BLB0	81	K	16	Up	0.265437	60S ribosomal protein L7a-1	LOC107809517	1	3.6e-29	154.65	TLDK(1)NLATNLFK	2	-0.21898	2	0.878	0.897	0.905	1.088	1.113	1.021	1.202	0.0025598	XP_009773142.1	Cluster 1	Clustered	28.9376
113	A0A1S4AM77	125	K	1	Up	0.603122	ycf54-like protein	LOC107799177	1	0.00374949	60.255	FLDK(1)FPNITK	3	-1.4508	1	0.745	0.968	0.711	1.163	1.455	1.063	1.519	0.03538	XP_009766784.1		Unclustered	11.4
203	A0A1S3XQS4	92	K	5	Up	0.494672	uncharacterized protein LOC107767513	LOC107767513	1	4.15e-13	85.518	SGYNVQVIVDDNEHEEK(1)LVGR	3	-0.48763	1	0.886	0.838	0.806	1.166	1.334	1.065	1.409	0.0087571	XP_009776818.1	Cluster 2	Clustered	13.0175
163	A0A1S4APT5	95	K	3	Up	0.486457	50S ribosomal protein L31	LOC107799884	1	2.48e-22	142.91	SALLVDADQVEK(1)FR	3	-0.37994	3	0.851	0.914	0.851	1.239	1.243	1.184	1.401	0.000295	XP_009785220.1	Cluster 1	Clustered	26.5034
99	A0A1S4AVN0	64	K	4	Up	0.469886	elongation factor P-like	LOC107801762	1	0.000242	75.088	AGSK(1)IEEANIYK	3	-0.38204	1	0.774	0.884	0.903	1.157	1.277	1.114	1.385	0.0066243	XP_009801645.1	Cluster 2	Clustered	13.7667
211	A0A1S3XQ62	242	K	3	Up	0.314986	Fructose-bisphosphate aldolase	LOC107767559	1	0.00962529	91.318	TFEVAK(1)K	3	0.38499	5	0.937	0.865	0.923	1.092	1.193	1.105	1.244	0.0041424	XP_009791026.1	Cluster 3	Clustered	10.3235
85	A0A1S4DA91	95	K	4	Up	0.381837	translationally-controlled tumor protein homolog	LOC107827662	1	0.00324239	90.15	YIK(1)NLTPK	2	0.67448	1	0.877	0.824	0.856	1.101	1.188	1.043	1.303	0.003258	XP_009767733.1	Cluster 1	Seed	29
82	Q40460	363	K	4	Up	0.54498	"Ribulose bisphosphate carboxylase/oxygenase activase 1, chloroplastic"	---	1	3.19e-06	110.93	K(1)WVSGTGIEK	3	1.1765	3	0.84	0.888	0.809	1.175	1.302	1.225	1.459	0.000719	XP_009762594.1	Cluster 2	Clustered	13.971
213	A0A1S4A1K3	163	K	2	Up	0.850399	Plastocyanin	LOC107792758	1	0.00673295	40.137	GTYSFYCSPHQGAGMVGK(1)VTVN	3	-1.813	1	0.761	0.929	0.665	1.42	1.597	1.229	1.803	0.008541	XP_009771635.1	Cluster 2	Clustered	15.2421
87	A0A1S4CUR0	194	K	1	Up	0.632268	"protease Do-like 1, chloroplastic"	LOC107822689	1	4.96e-11	125.5	VVGFDQDK(1)DVAVLK	2	-0.71663	2	0.848	0.805	0.783	1.056	1.601	1.118	1.55	0.033482	XP_009769548.1		Unclustered	2
209	A0A1S4C8D8	483	K	10	Up	0.776525	"ATP-dependent zinc metalloprotease FTSH, chloroplastic-like"	LOC107816214	1	1.04e-21	142.54	EISK(1)DEISDALER	2	-0.97472	2	0.759	0.804	0.726	1.022	1.649	1.25	1.713	0.021478	XP_009777632.1		Unclustered	3
184	A0A1S3ZM06	538	K	2	Up	0.499782	"preprotein translocase subunit SCY1, chloroplastic-like"	LOC107788151	0.999999	0.000927	61.409	YK(1)NIEFYDIDNKY	3	2.9835	1	0.876	0.82	0.899	1.14	1.298	1.232	1.414	0.00175888	XP_009774575.1		Unclustered	21.56
105	A0A1S4AIH6	348	K	2	Up	0.340277	"phosphoglucomutase, cytoplasmic-like"	LOC107798006	1	2.99e-05	99.344	LQSSLDEVNK(1)IIK	2	1.2213	2	0.956	0.921	0.776	1.143	1.098	1.118	1.266	0.021299	XP_009770894.1	Cluster 4	Seed	6.5641
190	A0A1S4CHR0	112	K	1	Up	0.453122	"fructose-1,6-bisphosphatase, cytosolic-like"	LOC107819136	1	2.89e-40	155.94	TCVLVSEEDEEATFVEPAK(1)R	3	1.7743	1	0.941	0.846	0.823	1.138	1.192	1.243	1.369	0.0028193	XP_009762610.1		Unclustered	6.66667
112	Q9XQP4	253	K	3	Up	0.895303	NAD-malate dehydrogenase	LOC107821463	1	0.00326793	68.657	ANTFVAQK(1)K	3	0.3049	1	0.87	0.689	0.672	1.301	1.378	1.47	1.86	0.0021977	XP_009778649.1		Unclustered	3.13725
16	A0A1S4BNL3	203	K	4	Down	-0.349235	"Elongation factor G, mitochondrial"	LOC107810234	1	0.00176047	83.869	LAFINK(1)LDR	2	-0.88057	1	1.183	1.091	1.214	0.936	0.954	0.849	0.785	0.0074768	XP_009799922.1	Cluster 1	Clustered	23.5897
205	A0A1S4CAI8	170	K	2	Up	0.377401	"protein CURVATURE THYLAKOID 1B, chloroplastic-like"	LOC107816925	1	0.00439908	86.898	EALISK(1)IK	3	0.093627	3	0.92	0.925	0.827	1.241	1.141	1.09	1.299	0.0076426	XP_009773141.1	Cluster 2	Clustered	13.8992
126	Q9ZS34	348	K	6	Up	0.483364	"Geranylgeranyl diphosphate reductase, chloroplastic"	CHLP	1	1.94e-05	87.824	CSGEGIYFAAK(1)SGR	2	1.0306	2	0.88	0.921	0.835	1.251	1.263	1.17	1.398	0.00084	XP_009778642.1	Cluster 2	Clustered	14.96
107	A0A1S4CMF2	312	K	2	Up	0.485427	"rhodanese-like domain-containing protein 4, chloroplastic"	LOC107820359	1	0.0277815	68.557	K(1)LLFAEDR	2	1.716	1	0.845	0.915	0.786	1.15	1.25	1.164	1.4	0.0027018	XP_009761641.1	Cluster 3	Clustered	12.3
145	A0A1S4DK32	120	K	2	Up	0.515006	"50S ribosomal protein L21, chloroplastic-like"	LOC107830548	1	0.00521242	62.463	LK(1)GANVNDK	3	-0.19959	1	0.844	0.885	0.827	1.128	1.399	1.125	1.429	0.0093428	XP_009786092.1	Cluster 1	Clustered	26.5034
187	A0A1S4D963	384	K	4	Up	0.657183	Protein translocase subunit SecA	LOC107827375	1	0.000242	75.088	ELFLK(1)DVNYIIR	3	-1.2399	1	0.77	0.892	0.712	1.312	1.159	1.272	1.577	0.0037812	XP_009763763.1		Unclustered	5.40711
75	A0A1S4B0F5	511	K	11	Up	0.795767	Serine hydroxymethyltransferase	LOC107803263	1	0.00506565	53.3	QFPTIGFEK(1)ETMK	3	-1.8566	1	0.733	0.731	0.752	1.082	1.382	1.383	1.736	0.02198	XP_009800891.1	Cluster 3	Clustered	10.3714
61	A0A1S3X0Y5	136	K	14	Up	0.681674	"Ferredoxin--NADP reductase, chloroplastic"	LOC107760150	1	6.3e-13	86.539	EGQSIGVIADGVDANGK(1)PHK	3	-0.094255	1	0.72	0.917	0.784	1.216	1.452	1.215	1.604	0.0068353	XP_009794242.1	Cluster 2	Clustered	13.7667
131	A0A1S4ARQ1	338	K	3	Up	0.558757	"calcium sensing receptor, chloroplastic-like"	LOC107800572	1	1.11e-16	96.55	TLTSLGFK(1)NCWIMTDGFSGGR	3	-1.1734	3	0.82	0.941	0.71	1.167	1.29	1.184	1.473	0.0107157	XP_009762078.1	Cluster 3	Clustered	12
19	A0A1S4ASN2	409	K	5	Up	0.491597	"photosynthetic NDH subunit of subcomplex B 1, chloroplastic-like"	LOC107801003	1	0.000155	71.279	GK(1)PSVGLFCSEDK	3	0.019155	1	0.844	0.831	0.881	1.154	1.186	1.253	1.406	0.000339	XP_009802476.1	Cluster 3	Clustered	10.5882
212	A0A1S3ZHH0	206	K	2	Up	0.457332	"psbP-like protein 1, chloroplastic"	LOC107786772	1	2.74e-25	113.21	HGLTAVCIGNGK(1)FYTLTTGANER	3	-0.84118	1	0.905	0.759	0.918	1.13	1.122	1.294	1.373	0.0142401	XP_009804509.1		Unclustered	9.69697
9	A0A1S4CSL9	232	K	5	Up	0.953824	"20 kDa chaperonin, chloroplastic-like"	LOC107822109	1	7.31e-12	102.98	YAGSEFK(1)GADGSDYITLR	2	-0.31405	2	0.819	0.65	0.767	1.265	1.897	1.169	1.937	0.0176358	XP_009791843.1		Unclustered	4
173	A0A1S4C3L2	111	K	15	Down	-0.597278	"Alpha-1,4 glucan phosphorylase"	LOC107814807	1	0.000277	60.489	FELPK(1)AFFATAQSVR	3	-1.1271	1	0.985	1.359	1.304	0.691	0.827	0.895	0.661	0.032076	XP_009764309.1	Cluster 4	Clustered	6.37778
183	A0A1S3ZX72	90	K	5	Up	0.582074	haloacid dehalogenase-like hydrolase domain-containing protein At3g48420	LOC107791365	1	5.5e-28	140.89	ALLFDCDGVLVDTEK(1)DGHR	4	-0.34704	2	0.708	0.958	0.838	1.079	1.242	1.428	1.497	0.027379	XP_009791081.1		Unclustered	9.61538
160	P18212	106	K	7	Up	0.635987	"Oxygen-evolving enhancer protein 2-2, chloroplastic"	PSBP2	1	1.44e-08	72.568	TDTDFQTYNGDGFK(1)LQIPSK	3	1.4097	1	0.764	0.874	0.802	1.229	1.293	1.27	1.554	0.000461	XP_009769223.1	Cluster 2	Clustered	14.6691
7	Q40519	71	K	1	Up	0.442545	"Photosystem II 10 kDa polypeptide, chloroplastic"	PSBR	1	0.000507	84.821	GK(1)GVYQFVDK	2	-0.56473	2	0.895	0.786	0.94	1.198	1.257	1.106	1.359	0.0091204	XP_009774551.1		Unclustered	8.83636
153	A0A1S3YJQ5	146	K	1	Up	0.405992	40S ribosomal protein S8	LOC107776903	0.999993	0.00420807	52.372	KEGEEAEAVPEEK(1)K	3	-0.84335	1	0.759	0.911	0.844	1.081	1.11	1.14	1.325	0.0067359	XP_009770276.1	Cluster 1	Clustered	28.8246
219	A0A1S3ZI08	152	K	1	Up	0.332278	Malate dehydrogenase	LOC107787080	1	0.00102653	63.091	TLCEGIAK(1)CCPK	3	-0.47432	1	0.786	0.821	1.002	1.151	1.039	1.095	1.259	0.042945	XP_009790667.1		Unclustered	7.91667
140	A0A1S3YL77	93	K	1	Down	-0.295128	"photosystem II 5 kDa protein, chloroplastic-like"	LOC107777466	1	0.000398	74.966	K(1)YYQVCVSNPTAR	2	0.43902	2	0.978	1.154	1.131	0.915	0.936	0.809	0.815	0.042003	XP_009780594.1	Cluster 3	Clustered	11.9394
118	A0A1S3Y892	513	K	4	Down	-0.488026	Pyruvate kinase	LOC107773422	1	1.21e-05	82.069	VVICQK(1)VGDASVVK	3	1.6674	2	1.263	1.204	1.247	0.88	0.894	0.873	0.713	2.45e-05	XP_009764320.1		Unclustered	9.53333
76	A0A1S4B900	96	K	6	Up	0.60502	"peroxiredoxin Q, chloroplastic-like"	LOC107805800	1	0.00123421	49.592	GK(1)PVVVYFYPADETPGCTK	3	-0.2415	1	0.804	0.728	0.879	1.141	1.331	1.196	1.521	0.0040757	XP_009799186.1	Cluster 2	Clustered	14.7794
60	A0A1S3Z334	184	K	13	Up	0.726831	"chloroplast stem-loop binding protein of 41 kDa b, chloroplastic"	LOC107782473	1	2.15e-14	116.06	TDYLPHFEADAVDPK(1)SR	3	0.3871	3	0.79	0.849	0.712	1.322	1.352	1.216	1.655	0.00111934	XP_009780849.1	Cluster 3	Clustered	12.8286
90	A0A1S4DPX6	156	K	4	Up	0.437228	60S ribosomal protein L24	LOC107832170	1	0.00361579	64.82	GPK(1)LGGGGGK	2	0.4963	1	0.813	0.848	0.861	1.194	1.156	1.064	1.354	0.00141509	XP_009803776.1	Cluster 1	Clustered	28.8246
20	A0A1S4C6D1	246	K	1	Up	0.437228	uncharacterized protein LOC107815685	LOC107815685	1	0.002027	81.923	NVEAK(1)DAAR	2	-0.51723	1	0.89	0.813	0.865	1.045	1.176	1.257	1.354	0.0075003	XP_009802498.1		Unclustered	3
191	P41098	63	K	6	Up	0.549916	60S ribosomal protein L34	RPL34	1	0.000747	58.32	IQGIPHLRPTEYK(1)R	3	-0.44703	2	0.847	0.775	0.798	1.13	1.197	1.217	1.464	0.000379	XP_009782773.1	Cluster 1	Clustered	28.8246
201	A0A1S4CGW7	112	K	2	Up	0.469886	GMP synthase [glutamine-hydrolyzing]-like	LOC107818590	1	0.00573579	61.56	IGEK(1)HEYGR	3	0.33439	1	0.834	0.762	0.854	1.161	1.108	1.124	1.385	0.000942	XP_009764602.1		Unclustered	2.94872
98	A0A1S4A1B1	277	K	3	Up	0.67084	"threonine--tRNA ligase, chloroplastic/mitochondrial 2"	LOC107792707	1	0.0314941	42.718	AYLHFK(1)EEAK	3	-0.13144	1	0.81	0.755	0.821	1.339	1.324	1.135	1.592	0.00145814	XP_009795256.1	Cluster 3	Clustered	11.6571
100	A0A1S3XQR5	132	K	3	Up	0.495695	Fructose-bisphosphate aldolase	LOC107767727	1	0.000422	89.805	CQK(1)YYEAGAR	2	-0.9583	1	0.865	0.687	0.811	1.066	1.27	0.995	1.41	0.026564	XP_009789131.1	Cluster 3	Clustered	10.3235
68	A0A1S3ZTG2	346	K	1	Down	-0.564905	eukaryotic peptide chain release factor GTP-binding subunit ERF3A-like	LOC107790262	1	0.000118	81.92	VLAIFCDEDK(1)VR	2	-0.03226	2	1.331	1.157	1.344	0.703	1.033	0.856	0.676	0.029702	XP_009780285.1		Unclustered	11
142	A0A1S4CWI7	19	K	1	Up	0.302173	40S ribosomal protein S26	LOC107823272	1	0.0299335	66.429	GHTK(1)FIR	3	0.26369	3	0.855	0.88	0.924	1.199	1.097	0.982	1.233	0.029142	XP_009788982.1	Cluster 1	Clustered	28.8246
111	A0A1S3Y0T4	427	K	27	Up	0.352759	elongation factor 2	LOC107770769	1	4.11e-05	105.52	DLYVK(1)NVQR	2	1.5353	3	0.819	0.917	0.875	1.038	1.235	1.062	1.277	0.0188368	XP_009801416.1	Cluster 1	Clustered	28.8246
96	A0A1S4DF55	72	K	6	Up	0.27023	60S ribosomal protein L18-2-like	LOC107829149	0.78147	0.0007	73.666	LISYAK(0.781)GK(0.219)EDK	3	1.0824	1	0.937	0.923	0.899	1.103	1.165	1.059	1.206	0.0034767	XP_009788537.1	Cluster 1	Clustered	28.8246
12	A0A1S4C4G8	57	K	5	Up	0.473008	60S ribosomal protein L38	LOC107815038	1	0.000556	62.69	LK(1)QSLPPGLSVQDL	2	2.929	1	0.877	0.872	0.789	1.17	1.135	1.219	1.388	0.0012007	XP_009782554.1	Cluster 1	Clustered	28.8246
122	A0A1S4BAT9	463	K	12	Up	0.553852	glutamate--glyoxylate aminotransferase 2	LOC107806358	1	1.33e-05	92.265	K(1)FNDEFMEQYEDHR	3	-0.8701	2	0.883	0.842	0.747	1.152	1.257	1.221	1.468	0.0023196	XP_009765091.1		Unclustered	1.41667
33	A0A1S3YHL0	572	K	2	Down	-0.394032	"pyruvate, phosphate dikinase, chloroplastic isoform X3"	LOC107776231	1	0.00208138	59.227	K(1)EALDSLLPYQR	3	0.73249	1	1.118	1.199	1.181	0.889	0.871	0.902	0.761	0.000319	XP_009780414.1		Unclustered	2.18182
32	A0A1S4C4F5	84	K	1	Up	0.442545	"glutamate-1-semialdehyde 2,1-aminomutase, chloroplastic-like"	LOC107815022	1	8.18e-08	96.208	AFK(1)SVGGQPVVIDSVK	3	0.11418	1	0.853	0.934	0.83	1.148	1.34	1.068	1.359	0.0161238	XP_009789880.1		Unclustered	1.4
148	A0A1S4AZJ1	475	K	5	Up	0.54893	"dihydrolipoyl dehydrogenase 2, chloroplastic-like"	LOC107802918	1	0.000121	73.927	DGFEISIAK(1)TSFK	3	0.44058	1	0.817	0.917	0.765	1.246	1.352	1.059	1.463	0.0132389	XP_009800218.1	Cluster 5	Clustered	3.92857
146	A0A1S4DCJ5	47	K	6	Up	0.301002	60S ribosomal protein L27a-3-like	LOC107828389	1	2.77e-15	136.3	ILFDK(1)YHPGYFGK	3	-1.6827	4	0.924	0.872	0.903	1.105	1.071	1.148	1.232	0.00135969	XP_009758493.1	Cluster 1	Clustered	28.8246
88	A0A1S3X9U6	511	K	5	Up	0.665393	"ATP-dependent zinc metalloprotease FTSH 2, chloroplastic"	LOC107762804	1	2.12e-10	55.406	SLVAYHEVGHAICGTLTPGHDAVQK(1)VTLIPR	5	-0.40655	1	0.71	0.93	0.756	1.4	1.308	1.091	1.586	0.0138401	XP_009768214.1		Unclustered	3
108	A0A1S4A4D2	434	K	4	Up	0.90458	"fe-S cluster assembly factor HCF101, chloroplastic-like isoform X2"	LOC107793652	1	1.18e-12	106.75	VK(1)VPDSDEEFYLHPATVR	3	0.87888	1	0.726	0.761	0.739	1.253	1.447	1.467	1.872	0.00028	XP_009764200.1		Unclustered	6
39	A0A1S4CAM8	279	K	3	Up	0.883621	Isocitrate dehydrogenase [NADP]	LOC107816938	1	0.00603447	77.062	K(1)WPLYLSTK	2	1.6616	1	0.739	0.742	0.611	1.221	1.469	1.169	1.845	0.0029957	XP_009768205.1		Unclustered	2.14286
106	A0A1S4B5M6	186	K	5	Up	0.916094	"malate dehydrogenase, glyoxysomal-like"	LOC107804686	1	0.000968	65.043	K(1)LLGVTSLDVVR	3	-0.16387	1	0.716	0.761	0.711	1.372	1.413	1.344	1.887	1.83e-05	XP_009779239.1		Unclustered	2.4
4	A0A1S4DIY1	560	K	9	Up	0.345964	"ruBisCO large subunit-binding protein subunit beta, chloroplastic-like"	LOC107830331	1	0.0058394	42.068	YEDLMAAGIIDPTK(1)VVR	3	-0.32335	1	0.935	0.835	0.875	1.075	1.179	1.108	1.271	0.0048771	XP_009793336.1		Unclustered	1.66667
158	A0A1S3ZHM0	230	K	1	Up	0.648005	"magnesium-protoporphyrin IX monomethyl ester [oxidative] cyclase, chloroplastic-like"	LOC107786828	1	0.00774213	46.66	HLK(1)ANPEYTCYPIFK	3	4.2512	1	0.761	0.914	0.823	1.272	1.5	1.143	1.567	0.0094351	XP_009777441.1	Cluster 2	Clustered	14.087
168	A0A1S4BYQ0	57	K	15	Down	-0.926865	Glyceraldehyde-3-phosphate dehydrogenase	LOC107813294	1	1.94e-07	105.14	YDSVHGQWK(1)NHELK	4	-0.97343	2	1.416	1.455	1.483	0.778	0.775	0.739	0.526	3.61e-06	XP_009792011.1	Cluster 3	Clustered	10.3235
114	A0A1S4DDQ7	89	K	1	Up	0.271426	"50S ribosomal protein L5, chloroplastic-like"	LOC107828527	1	1.39e-07	84.375	EEFNYTNIHQVPK(1)VEK	3	1.717	1	0.914	0.945	0.879	1.15	1.124	1.031	1.207	0.0088204	XP_009782093.1	Cluster 1	Clustered	23.7829
63	A0A1S3YCF2	139	K	4	Up	0.545968	40S ribosomal protein S12	LOC107774609	1	4.89e-14	113.81	DFGEETEGLHIVQEYVK(1)SH	3	-0.41099	1	0.771	0.871	0.765	1.215	1.208	1.091	1.46	0.002276	XP_009763379.1	Cluster 1	Clustered	28.9376
128	A0A1S4BGF6	273	K	3	Up	0.468844	Pyruvate kinase	LOC107807979	1	2.89e-07	70.41	GDLGMEIPIEK(1)IFLAQK	3	-0.53212	1	0.865	0.801	0.777	1.098	1.257	1.025	1.384	0.0090197	XP_009757909.1	Cluster 3	Clustered	10.3235
41	A0A1S3ZNY6	534	K	1	Down	-0.325539	GTP-binding protein TypA/BipA homolog	LOC107788877	1	0.00120884	87.895	AFLTYEK(1)YR	2	0.2236	1	1.147	1.298	1.097	0.909	0.983	0.935	0.798	0.0155816	XP_009790363.1		Unclustered	8
13	P27494	42	K	2	Up	0.302173	"Chlorophyll a-b binding protein 36, chloroplastic"	CAB36	1	2.73e-57	182.31	TVK(1)SAPQSIWYGEDRPK	3	-0.71387	3	0.875	0.918	0.995	1.033	1.229	1.175	1.233	0.031616	XP_009802594.1		Unclustered	9.61538
74	A0A1S4D251	221	K	7	Up	0.471968	"ribosome-recycling factor, chloroplastic-like"	LOC107825140	1	0.027581	58.917	AYEK(1)LEK	3	-0.31178	1	0.867	0.778	0.893	1.235	1.245	1.041	1.387	0.0105406	XP_009761918.1	Cluster 1	Clustered	26.5034
45	A0A1S4DGP1	211	K	5	Up	0.772308	Nucleoside diphosphate kinase	LOC107829496	1	0.000758	58.817	NVVHGSDSPDNGK(1)R	3	-0.12623	1	0.905	0.669	0.683	1.177	1.417	1.261	1.708	0.0082608	XP_009778027.1		Unclustered	5
134	A0A1S4D092	269	K	4	Up	0.597412	thylakoid membrane protein slr0575-like	LOC107824447	1	0.0380092	46.985	GEK(1)DALYEVR	2	-0.58023	1	0.847	0.849	0.774	1.282	1.32	1.134	1.513	0.00176036	XP_009798977.1	Cluster 3	Clustered	10.7179
199	A0A1S4BBF5	318	K	3	Up	0.356144	"triosephosphate isomerase, chloroplastic-like"	LOC107806500	1	5.18e-07	83.292	GPEFASIVNSVTSK(1)K	3	4.3561	1	0.833	0.874	0.94	1.17	1.142	1.076	1.28	0.0045408	XP_009768928.1	Cluster 3	Clustered	11.8713
156	A0A1S4DJU8	373	K	12	Up	0.446786	Elongation factor 1-alpha	LOC107830554	1	0.0449809	59.908	SGK(1)ELEK	2	-0.835	1	0.765	0.919	0.838	1.178	1.192	1.068	1.363	0.0079591	XP_009762748.1	Cluster 1	Clustered	25
38	A0A1S3ZBE2	37	K	8	Up	0.318461	40S ribosomal protein S11	LOC107785006	1	0.000196	91.549	YFK(1)SIGLGFK	3	-1.6056	1	0.884	0.925	0.838	0.984	1.186	1.13	1.247	0.025481	XP_009764798.1	Cluster 1	Clustered	28.8246
138	A0A1S4D971	156	K	2	Up	0.371838	probable 2-carboxy-D-arabinitol-1-phosphatase	LOC107827185	1	1.4e-12	119.45	EIDLYSFQGLLK(1)HEGK	3	1.682	2	0.914	0.885	0.802	1.086	1.178	1.102	1.294	0.0051563	XP_009802341.1		Unclustered	4.46429
30	A0A1S3XTB8	334	K	4	Down	-0.498179	heat shock cognate 70 kDa protein 2-like	LOC107768506	1	2.5e-07	71.592	MDK(1)STVHDVVLVGGSTR	3	0.69247	2	1.227	1.313	1.153	0.807	0.944	0.865	0.708	0.0042162	XP_009777579.1		Unclustered	0
125	A0A1S3WX25	164	K	5	Up	0.471968	Glucose-6-phosphate 1-dehydrogenase	LOC107758909	1	4.2e-96	222.88	NYCMNK(1)SDLGGWTR	3	0.028812	2	0.735	0.798	0.924	1.118	1.163	1.128	1.387	0.0081564	XP_009774777.1	Cluster 3	Clustered	10.6737
147	A0A1S4CG96	49	K	2	Up	0.349365	mitochondrial import receptor subunit TOM40-1-like	LOC107818614	1	6.95e-07	80.738	EALMSLK(1)PELFEGLR	2	0.55049	2	0.827	0.98	0.828	1.214	1.156	0.988	1.274	0.044875	XP_009766087.1		Unclustered	4.28571
48	A0A1S4BZQ6	448	K	3	Up	0.504875	Thioredoxin reductase	LOC107813539	1	0.00132708	94.114	HK(1)GQYALR	2	0.93776	2	0.839	0.789	0.842	1.081	1.267	1.156	1.419	0.0023429	XP_009767118.1		Unclustered	5.72727
119	A0A1S4ALJ9	316	K	9	Up	0.447844	Glucose-1-phosphate adenylyltransferase	LOC107798981	1	5.65e-11	74.905	DK(1)FPGANDFGSEVIPGATSLGMR	3	-0.93048	1	0.822	0.786	0.902	1.069	1.139	1.216	1.364	0.0048383	XP_009768525.1		Unclustered	4.7619
0	A0A1S3XKM0	169	K	10	Up	0.648005	Glutamine synthetase	LOC107766022	1	0.00117041	65.842	HK(1)AAQIFSDSK	3	-0.40517	1	0.724	0.698	0.987	1.302	1.206	1.267	1.567	0.0147167	XP_009773609.1		Unclustered	2.14286
161	Q8LSZ3	328	K	4	Down	-0.608232	NADPH-protochlorophyllide oxidoreductase	POR1	1	9.67e-05	90.861	LLFPPFQK(1)YITK	2	-0.83715	2	1.157	1.069	1.185	0.672	0.825	0.741	0.656	0.0031787	XP_009774675.1		Unclustered	4
133	A0A1S4BU79	183	K	3	Up	0.348232	elongation factor 1-beta-like	LOC107811954	1	0.00199894	79.986	LVPVGYGIK(1)K	2	-0.58405	1	0.885	0.952	0.807	1.109	1.216	1.041	1.273	0.021265	XP_009800163.1	Cluster 1	Clustered	28.8246
72	A0A1S4C9D4	949	K	7	Up	0.337996	ubiquitin-activating enzyme E1 1-like	LOC107816375	1	0.000217	79.089	VLDGGHK(1)VEDYR	2	-1.216	2	0.855	0.898	0.86	1.148	1.098	1.057	1.264	0.00119509	XP_009804780.1		Unclustered	2
27	A0A1S4A5I6	125	K	1	Up	0.721591	"thylakoid lumenal 17.4 kDa protein, chloroplastic-like"	LOC107793983	1	1.92e-06	105.03	FCDYTNEK(1)NNLK	3	0.78108	1	0.78	0.779	0.829	1.276	1.341	1.32	1.649	3.91e-05	XP_009799240.1		Unclustered	6.37778
78	A0A1S4B487	272	K	2	Up	0.580145	uncharacterized protein LOC107804369	LOC107804369	1	1.5e-05	100.02	AVAHFPTAVK(1)EFK	3	0.89851	2	0.831	0.791	0.798	1.155	1.352	1.11	1.495	0.0030372	XP_009757383.1		Unclustered	6.53333
59	A0A1S3YFK6	661	K	2	Up	0.52707	NHL repeat-containing protein 2	LOC107775778	1	4.98e-07	87.647	K(1)NLLYVADTENHALR	3	-1.3407	1	0.832	0.867	0.785	1.115	1.132	1.333	1.441	0.0047767	XP_009790946.1		Unclustered	4.46429
67	A0A1S4ABU0	650	K	1	Up	0.271426	"LOW QUALITY PROTEIN: isoleucine--tRNA ligase, chloroplastic/mitochondrial"	LOC107795941	1	0.00313777	61.958	YCDK(1)ASNYEK	2	1.1255	2	0.94	0.961	0.854	1.075	1.029	1.22	1.207	0.040824	XP_009779859.1		Unclustered	2.2
174	A0A1S4D6U2	179	K	4	Up	0.362891	Peptidylprolyl isomerase	LOC107826615	1	1.07e-08	72.316	GWDQGILGGDGFPPMLTGGK(1)R	3	-0.43705	1	0.866	0.95	0.861	1.17	1.108	1.165	1.286	0.0022599	XP_009777144.1		Unclustered	6.01579
21	A0A1S4CPN2	127	K	13	Up	0.298658	Dihydrolipoyl dehydrogenase	LOC107821052	1	0.0399429	48.568	DK(1)AVANLTR	2	-1.5186	1	0.867	0.869	0.947	1.057	1.17	1.072	1.23	0.0086612	XP_009793318.1	Cluster 5	Seed	3.92857
25	A0A1S4D955	188	K	3	Up	0.501821	"Succinate--CoA ligase [ADP-forming] subunit beta, mitochondrial"	LOC107827369	1	2.28e-09	109.07	VPIDVFK(1)GISDEDAAK	3	0.4855	1	0.748	0.868	0.803	1.066	1.255	1.105	1.416	0.0060956	XP_009790645.1		Unclustered	3.04762
124	A0A1S4D9M3	462	K	1	Up	0.745022	Nucleolar GTP-binding protein 1	LOC107827460	1	0.00309437	54.343	K(1)STAESRPTVPR	3	-0.79496	1	0.709	0.523	0.841	1.094	1.237	1.144	1.676	0.020436	XP_009782696.1		Unclustered	8
69	A0A1S3ZLP3	239	K	7	Up	0.337996	"Adenylosuccinate synthetase, chloroplastic"	LOC107788158	1	7.34e-12	90.718	HMDTFPQK(1)LDLLLSDAASR	3	-1.0886	1	0.892	0.907	0.878	1.051	1.14	1.192	1.264	0.003603	XP_009785149.1		Unclustered	2
92	A0A1S4C1K4	142	K	5	Down	-0.28279	"ATP synthase subunit O, mitochondrial-like"	LOC107814191	1	0.00250317	68.626	LK(1)HIDAIAK	3	-0.011883	1	1.128	1.177	1.07	0.852	0.978	0.945	0.822	0.0168035	XP_009758218.1		Unclustered	3.42857
35	A0A1S4BE66	75	K	7	Up	1.31383	"fructose-1,6-bisphosphatase, cytosolic"	LOC107807379	1	0.000143	85.554	K(1)LDVLSNEVFIK	3	-0.85143	1	0.735	0.683	0.634	1.657	1.852	1.592	2.486	0.000123	XP_009771610.1		Unclustered	6.66667
127	A0A1S4BB89	473	K	3	Down	-0.365871	Glucose-1-phosphate adenylyltransferase	LOC107806492	1	6.21e-14	133.16	IKECIIDK(1)NAR	2	-0.8559	6	1.142	1.126	1.145	0.847	0.923	0.878	0.776	0.000562	XP_009760082.1		Unclustered	3.73333
95	A0A1S4BDA7	164	K	7	Up	0.366252	"2-Cys peroxiredoxin BAS1, chloroplastic"	LOC107807034	1	4.83e-35	153.65	K(1)SGGLGDLNYPLISDVTK	2	2.2214	6	0.849	0.828	0.902	1.011	1.149	1.164	1.289	0.0081195	XP_009766233.1		Unclustered	3.46667
141	A0A1S4CX06	124	K	1	Up	0.591679	"peroxiredoxin-2E-2, chloroplastic-like"	LOC107823523	1	0.00135926	67.334	HLPGFVEK(1)SK	3	1.8366	1	0.735	0.891	0.808	1.11	1.26	1.297	1.507	0.0049822	XP_009774055.1		Unclustered	2.7
10	A0A1S4DSL7	411	K	6	Up	0.334568	ruBisCO large subunit-binding protein subunit alpha-like	LOC107832769	1	1.49e-45	172.93	KELSETDSVYDSEK(1)LAER	3	-0.43399	3	0.895	0.947	0.825	1.159	1.204	1.001	1.261	0.028844	XP_009799931.1		Unclustered	2.4
210	A0A1S4AWT3	129	K	4	Up	0.397255	Peptidyl-prolyl cis-trans isomerase	LOC107802154	1	9.75e-15	135.1	GFGYK(1)DSAFHR	2	-0.93007	5	0.821	0.91	0.883	1.168	1.244	1.031	1.317	0.0123045	XP_009792707.1		Unclustered	4
176	A0A1S4CR54	138	K	2	Up	1.02361	"photosystem I reaction center subunit VI-1, chloroplastic-like"	LOC107821676	1	0.00337106	55.314	GPQLPPK(1)LGPR	3	1.8165	1	0.763	0.712	0.702	1.752	1.088	1.585	2.033	0.0094201	XP_009777894.1		Unclustered	6.80556
193	A0A1S3YNJ0	388	K	1	Up	0.39835	"peptidyl-prolyl cis-trans isomerase CYP37, chloroplastic-like isoform X2"	LOC107778011	1	0.00236575	67.019	SAK(1)LVEGQDR	2	-2.2174	1	0.915	0.851	0.869	1.212	1.166	1.095	1.318	0.00166091	XP_009795940.1		Unclustered	2
197	A0A1S4CIH3	183	K	1	Up	0.508936	"PGR5-like protein 1A, chloroplastic"	LOC107819369	1	0.000195	97.093	K(1)VYSDLYVDYLR	2	-0.77379	1	0.838	0.869	0.867	1.205	1.211	1.246	1.423	2.16e-05	XP_009776121.1		Unclustered	7.56364
154	A0A1S3Z1F3	809	K	19	Up	0.358396	"ferredoxin-dependent glutamate synthase, chloroplastic-like"	LOC107781744	1	2.85e-17	135.81	MPTVTIEQAQK(1)NFCK	3	-0.34558	3	0.856	0.892	0.878	1.07	1.154	1.143	1.282	0.000738	XP_009794669.1		Unclustered	1.82143
94	A0A1S4CKP8	290	K	2	Up	0.328836	"dihydrolipoyllysine-residue succinyltransferase component of 2-oxoglutarate dehydrogenase complex 1, mitochondrial-like"	LOC107819849	1	0.000434	72.321	DAFVEK(1)HGVK	3	0.3338	3	0.886	0.856	0.873	1.064	1.128	1.092	1.256	0.000318	XP_009766827.1	Cluster 5	Clustered	3.44444
172	A0A1S4BNP6	338	K	17	Up	0.649845	"chaperonin 60 subunit beta 2, chloroplastic"	LOC107810219	1	0.000133	54.511	K(1)SQYLDDIATLTGGTVIR	3	1.3385	1	0.721	0.84	0.82	1.261	1.47	1.005	1.569	0.021462	XP_009790232.1		Unclustered	1.66667
137	A0A139ZSG9	39	K	1	Up	0.340277	"6-phosphogluconate dehydrogenase, decarboxylating"	LOC107779182	1	0.00033	87.989	STSK(1)VDETVER	2	0.72896	1	0.831	0.874	0.836	1.099	1.066	1.052	1.266	0.000323	XP_009773713.1		Unclustered	3.42857
130	A0A140G1R9	237	K	1	Up	0.740712	NADH-quinone oxidoreductase subunit B	ndhK	1	0.000202	82.069	YK(1)NSVSSPELVN	2	-0.057406	1	0.807	0.79	0.743	1.209	1.418	1.283	1.671	0.000625	XP_009790602.1		Unclustered	0.666667
62	A0A1S4D0D5	172	K	4	Up	0.347099	"protein LOW PSII ACCUMULATION 3, chloroplastic-like"	LOC107824589	0.99806	0.000207	77.597	ACVVFPDK(0.002)PEK(0.998)R	3	-0.38078	1	0.962	0.905	0.813	1.079	1.284	1.046	1.272	0.041338	XP_009764803.1		Unclustered	3
120	A0A1S4A2R3	74	K	2	Up	0.54893	uncharacterized protein LOC107793146	LOC107793146	1	9.17e-07	108.58	EDQLLEVDPILK(1)K	3	0.1837	1	0.829	0.886	0.86	1.148	1.546	1.072	1.463	0.032177	XP_009763724.1		Unclustered	6.23636
218	A0A1S4A2K0	116	K	1	Up	0.367371	"methionine--tRNA ligase, chloroplastic/mitochondrial-like"	LOC107793139	1	1.46e-10	117	K(1)VIFITGTDEHGEK	3	0.42065	1	0.868	0.894	0.88	1.072	1.204	1.133	1.29	0.00183906	XP_009759287.1		Unclustered	2.7
121	A0A1S4BLF6	205	K	4	Up	0.535058	Proteasome subunit alpha type	LOC107809579	1	0.000121	80.69	IIYGVHDEAK(1)DK	3	-0.55116	1	0.843	0.714	0.788	1.051	1.11	1.236	1.449	0.0054403	XP_009786461.1	Cluster 6	Clustered	2.7
155	A0A1S3YLS0	147	K	1	Up	0.31034	"rhodanese-like domain-containing protein 4A, chloroplastic"	LOC107777443	1	6.5e-05	95.417	YK(1)FISAVDAFGK	3	-0.46535	1	0.932	0.857	0.94	1.22	1.123	1.042	1.24	0.0168556	XP_009763928.1		Unclustered	4
167	I7GVS5	539	K	21	Up	1.33571	Heat shock protein 70	NtHsp70	0.999871	0.048105	40.496	YKSEDEEHK(1)K	3	0.24943	1	0.624	0.344	0.499	0.924	1.763	1.015	2.524	0.026561	XP_009785159.1		Unclustered	0
188	A0A1S4DJ12	306	K	3	Up	0.301002	"Succinate--CoA ligase [ADP-forming] subunit alpha, mitochondrial"	LOC107830273	1	0.00439908	86.898	GTAQDK(1)IK	2	0.23707	1	0.87	0.825	0.932	1.069	1.019	1.148	1.232	0.0135045	XP_009781531.1		Unclustered	3.88889
104	L7UU40	98	K	3	Up	0.423309	26S protease regulatory subunit 8 homolog A-like	RPT6	1	0.00508108	56.548	VLVK(1)VHPEGK	3	0.757	1	0.85	0.811	0.854	1.119	1.168	1.085	1.341	0.000404	XP_009770420.1	Cluster 6	Seed	2.7
54	A0A140G1Q7	318	K	1	Up	0.654436	Photosystem II D2 protein	psbD	1	4.72e-51	167.51	AAEDPEFETFYTK(1)NILLNEGIR	2	-0.43065	4	0.835	0.779	0.857	1.249	1.24	1.401	1.574	0.000743	XP_009762297.1		Unclustered	0
208	A0A1S4AH78	364	K	1	Up	0.936591	"Zeaxanthin epoxidase, chloroplastic"	LOC107797654	1	0.0100151	46.156	DIYDRPPTFNWGK(1)GR	3	0.096002	1	0.718	0.844	0.69	1.57	1.435	1.305	1.914	0.00133952	XP_009767383.1		Unclustered	2
116	A0A1S4AQA4	369	K	3	Up	0.298658	"peptide chain release factor PrfB1, chloroplastic-like"	LOC107800112	1	0.0134518	67.334	SQLANK(1)IK	2	2.2422	1	0.867	0.891	0.992	1.016	1.249	1.117	1.23	0.047379	XP_009791270.1		Unclustered	6
73	A0A1S4AWU1	60	K	3	Up	0.412511	"peroxiredoxin-2F, mitochondrial-like"	LOC107802071	1	0.000104	96.229	FSTTPLK(1)DIFK	3	-0.27626	1	0.836	0.83	0.89	1.005	1.298	1.098	1.331	0.02306	XP_009766367.1		Unclustered	2.7
216	A0A1S4DN02	43	K	2	Up	0.344828	Peptidylprolyl isomerase	LOC107831294	1	4.23e-12	120.7	FWSTK(1)DPDQQPFSFK	3	2.3612	1	0.81	0.871	0.959	1.068	1.103	1.181	1.27	0.0136786	XP_009771146.1		Unclustered	2
77	P69249	176	K	2	Up	0.52707	"Ribulose bisphosphate carboxylase small chain, chloroplastic"	RBCS	1	1.18e-16	128.76	QVQCISFIAYK(1)PEGY	3	-1.618	10	0.824	0.907	0.807	1.142	1.298	1.216	1.441	0.002103	XP_009795056.1		Unclustered	2
151	A0A1S4CJD2	103	K	3	Down	-0.341903	Peptidylprolyl isomerase	LOC107819710	1	9.17e-32	158.45	GWDQGLLGMCVGEK(1)R	2	-0.41976	5	1.179	1.153	1.086	0.853	0.965	0.88	0.789	0.0059182	XP_009788440.1		Unclustered	2
40	A0A1S4CNM1	124	K	1	Up	0.408168	Peptidylprolyl isomerase	LOC107820813	1	0.0364367	49.466	ESK(1)LLAGNR	2	-1.2611	1	0.796	0.855	0.936	1.078	1.235	1.121	1.327	0.0101419	XP_009766637.1		Unclustered	0
171	A0A1S4B2J7	545	K	3	Down	-0.494109	heat shock cognate 70 kDa protein 2	LOC107803885	0.919484	2.03e-06	69.289	K(0.081)VEAK(0.919)NALENYSYNMR	3	0.085434	1	1.284	1.27	1.221	0.865	0.882	0.933	0.71	0.000236	XP_009786102.1		Unclustered	0
15	A0A1S4AJR8	1709	K	5	Up	0.425459	eIF-2-alpha kinase activator GCN1 isoform X2	LOC107798395	1	5.12e-06	105.2	NCSHQK(1)ASVR	3	-1.0582	2	0.742	0.939	0.805	1.072	1.163	1.103	1.343	0.0149432	XP_009775450.1		Unclustered	2

## Sheet: links
Source	Target	Value
55	135	931
64	18	894
43	189	702
102	53	863
37	43	826
192	214	713
52	177	991
196	31	836
217	152	800
115	71	859
66	22	971
50	207	990
65	17	918
47	91	728
65	195	910
84	5	803
14	2	705
185	11	727
162	1	981
6	157	765
70	17	870
110	179	981
109	34	972
64	80	961
166	34	971
97	165	757
81	139	916
44	23	870
17	22	874
143	80	732
192	56	942
50	135	774
102	56	851
91	182	832
91	22	995
204	200	981
17	5	870
86	149	988
166	109	983
129	175	995
8	170	870
57	24	961
57	177	994
181	136	874
93	136	888
132	89	855
86	180	776
186	56	942
164	129	966
17	144	870
49	34	972
26	66	778
28	83	843
192	58	815
215	207	819
115	42	766
196	34	841
117	46	835
5	53	954
150	3	870
198	194	776
198	162	968
65	51	880
56	152	978
44	83	870
202	162	786
91	101	704
91	79	778
97	159	720
71	31	870
110	84	988
200	123	974
31	177	870
36	164	859
178	206	866
103	79	722
169	29	989
113	203	829
64	50	878
163	99	863
66	175	930
8	177	873
115	211	849
85	93	870
82	213	870
84	50	990
5	46	820
87	209	779
184	46	719
81	105	916
190	112	792
157	16	778
205	126	847
107	145	784
36	56	849
187	194	911
102	75	880
215	50	964
5	149	996
56	61	748
102	131	809
132	22	877
19	212	870
194	9	833
198	18	972
178	31	870
173	152	778
44	183	885
160	177	980
181	46	897
17	3	870
51	7	797
102	178	880
164	150	833
153	162	981
11	175	759
56	219	716
140	177	975
118	159	730
163	50	879
91	76	870
85	1	853
107	60	870
84	207	989
123	90	983
91	211	884
183	20	840
191	50	978
131	189	851
205	170	857
201	98	826
187	183	874
50	16	774
91	100	778
68	142	842
102	219	870
55	111	899
107	17	870
50	142	989
18	204	985
215	96	806
97	76	889
34	1	983
55	16	929
34	46	902
81	164	991
80	207	983
93	12	986
5	99	750
71	76	835
122	33	916
132	126	880
102	109	865
118	211	749
57	212	736
142	90	981
195	109	834
136	111	879
109	157	853
181	201	903
109	207	833
44	149	870
28	32	958
145	50	882
18	145	893
112	33	859
122	148	915
146	200	987
190	152	711
88	209	921
108	24	859
84	198	976
43	177	870
39	106	754
146	215	856
9	4	962
198	204	884
158	150	784
98	34	950
204	135	712
135	34	931
168	79	940
71	177	870
114	99	952
63	179	981
128	66	755
163	1	918
55	41	909
136	80	969
213	211	779
18	207	990
170	13	955
136	1	871
194	157	968
2	212	864
49	163	987
131	205	870
153	80	983
64	114	967
63	12	975
29	96	979
63	1	982
74	76	874
58	79	815
24	83	887
185	118	727
110	162	984
17	101	870
24	86	870
45	114	870
145	99	949
91	134	916
115	13	910
8	98	898
214	165	756
146	153	986
213	7	930
44	163	870
163	76	870
191	149	841
164	79	933
12	149	866
186	219	787
198	142	975
81	217	806
82	206	866
1	149	894
50	162	986
97	49	896
199	36	991
74	157	989
207	34	929
215	46	979
126	52	836
96	180	968
88	53	824
192	36	929
186	164	929
71	126	869
185	106	822
86	111	774
150	194	771
37	52	993
192	8	724
108	23	859
110	18	989
186	47	940
43	24	955
49	80	825
82	91	949
64	98	878
156	191	734
80	194	878
194	149	984
184	114	870
38	180	985
36	138	777
128	81	944
131	22	870
169	50	982
215	191	702
114	142	907
199	168	959
110	50	988
24	20	870
30	111	754
131	8	870
81	125	806
166	147	832
74	93	829
178	60	887
63	180	975
52	22	870
57	56	856
163	157	992
179	204	950
153	136	887
74	18	851
125	47	785
107	132	868
169	64	947
145	76	870
18	180	981
48	119	767
178	65	892
26	139	961
163	43	853
107	44	870
111	1	983
163	207	925
131	206	870
162	34	954
82	158	870
192	219	787
81	111	902
97	168	986
187	150	839
97	187	915
63	50	979
93	109	833
82	56	866
184	18	874
64	149	992
200	149	900
204	90	977
3	76	870
2	24	870
136	50	870
29	18	986
17	98	866
49	195	834
179	50	988
84	194	772
60	177	870
85	179	870
169	111	975
146	184	874
102	132	870
12	46	980
74	114	989
38	114	855
102	134	870
153	180	972
199	22	972
55	194	981
81	8	897
132	8	879
194	76	846
44	19	772
108	60	870
0	60	870
132	17	870
187	5	908
102	148	703
156	50	930
157	162	904
52	13	835
161	182	721
199	100	866
115	51	892
85	46	873
63	198	972
110	215	746
31	3	907
109	5	965
169	133	880
6	113	841
74	163	918
38	18	989
146	96	979
146	109	804
28	217	712
74	98	951
29	111	978
207	90	988
203	114	976
191	96	977
12	90	987
18	109	808
192	152	938
204	180	915
132	19	870
128	211	782
34	149	994
194	16	814
211	177	867
109	53	743
8	144	721
145	46	818
57	91	945
36	72	736
153	84	986
153	200	986
129	66	889
109	76	833
169	153	987
34	27	816
100	152	893
163	16	897
115	60	842
85	111	905
143	8	782
38	207	983
157	46	838
17	75	872
74	32	865
57	107	838
91	183	833
156	80	891
14	91	784
97	140	870
207	111	984
49	207	833
93	46	988
113	158	849
82	170	875
203	86	976
205	140	877
65	60	908
65	177	994
184	207	799
78	23	870
59	23	869
65	56	856
17	145	872
114	76	870
97	44	889
190	60	840
78	89	870
156	63	864
67	53	851
205	3	885
24	183	873
51	126	842
192	199	849
74	184	845
199	129	889
74	46	733
191	142	973
164	175	977
37	211	856
204	46	985
136	142	880
174	86	870
31	22	866
179	149	862
33	91	726
213	56	914
60	91	899
110	68	730
169	18	987
115	205	898
34	16	923
44	27	844
14	17	961
23	76	870
44	205	870
169	86	871
123	157	845
102	91	870
58	100	815
146	194	855
31	76	718
114	50	855
136	207	888
186	22	991
21	148	833
65	150	878
178	52	874
82	65	892
55	80	920
125	11	761
31	126	881
140	37	975
185	103	729
192	217	742
147	109	905
204	16	712
179	93	986
29	80	979
5	194	986
214	219	849
169	46	987
96	142	984
198	111	970
158	91	891
25	21	936
65	22	873
5	134	786
29	215	928
145	83	979
205	60	870
169	146	989
150	219	711
64	123	864
86	1	878
112	66	820
50	180	983
105	152	845
164	47	937
65	140	953
131	82	870
196	114	858
110	90	978
214	79	713
169	204	981
55	1	963
83	99	883
146	50	991
18	142	990
201	124	870
132	60	870
84	157	863
166	184	867
113	145	870
142	135	723
175	211	820
195	150	922
183	23	870
191	180	969
115	126	910
31	23	870
194	99	827
102	158	870
36	69	917
106	66	739
93	180	985
106	159	768
173	36	935
206	61	720
194	135	838
196	99	730
92	112	783
18	162	981
205	101	866
102	82	880
18	111	984
86	162	820
97	71	865
36	150	832
74	27	848
136	124	870
123	180	984
150	19	870
57	61	813
150	183	877
12	1	975
215	18	910
153	215	855
109	117	854
66	100	866
96	133	918
109	98	743
24	177	885
118	192	776
2	135	856
35	91	937
118	175	759
92	170	805
2	23	873
127	26	913
150	101	873
206	22	878
78	132	870
64	5	965
3	24	870
174	145	870
48	76	907
192	2	868
95	141	948
57	115	984
87	17	815
44	99	813
55	5	991
8	139	787
88	87	734
55	74	955
64	207	889
84	12	988
146	111	982
148	75	744
146	156	925
9	10	987
182	42	721
146	136	871
102	2	870
12	142	985
13	177	974
81	199	963
185	165	727
9	182	931
49	64	992
174	210	854
199	56	961
60	134	909
201	29	857
55	145	990
64	34	993
142	1	978
145	149	986
71	158	869
11	152	755
48	148	811
63	200	986
41	1	728
18	86	873
55	162	912
178	2	945
97	47	986
119	36	841
97	39	709
26	173	875
102	106	870
14	51	732
184	50	808
102	143	799
53	34	870
79	22	958
23	34	870
153	1	978
176	177	869
43	101	784
129	211	801
152	79	938
140	60	870
3	101	852
43	193	719
93	133	875
60	163	783
113	157	860
17	23	912
195	91	909
18	123	987
103	211	749
63	162	973
190	211	820
63	111	943
128	8	719
197	37	894
199	211	849
141	76	789
107	205	885
45	32	895
46	90	988
55	9	777
201	135	922
198	133	865
123	162	984
145	210	826
8	2	917
191	194	860
194	90	773
55	109	953
139	175	936
143	34	905
55	18	916
192	170	842
191	200	986
85	162	870
47	175	826
60	189	932
205	31	870
74	53	862
123	111	985
123	34	923
29	12	978
213	37	922
160	170	873
66	211	849
0	154	901
3	23	870
114	163	931
140	24	865
5	157	994
165	175	759
178	17	898
191	90	985
45	145	874
103	129	863
178	22	944
122	154	953
112	148	791
18	12	986
94	25	996
183	19	870
197	177	899
199	175	930
26	119	957
178	158	870
17	126	870
163	27	855
173	66	778
219	148	791
97	164	973
56	79	940
44	203	870
172	86	760
38	163	914
109	135	969
8	159	969
146	93	989
80	145	944
160	140	936
146	12	987
128	129	765
76	27	844
53	75	801
137	164	769
8	214	947
63	38	981
133	46	880
142	111	965
64	130	898
2	100	833
169	200	989
24	210	822
184	80	883
190	91	937
153	142	975
179	96	983
56	129	955
107	91	850
74	187	948
64	163	903
178	202	985
14	37	990
86	76	870
55	93	949
184	204	750
94	21	998
82	150	927
186	214	713
187	62	870
131	51	870
98	149	940
35	66	702
201	215	888
93	5	888
215	12	763
17	189	921
110	85	896
205	163	835
23	22	883
96	90	980
81	138	922
153	86	779
200	162	986
156	180	711
97	192	930
37	189	932
124	90	774
178	37	923
115	37	981
146	207	989
175	152	930
49	86	969
166	157	945
156	18	705
184	149	874
178	91	949
8	152	731
74	110	733
168	152	968
17	212	958
102	76	875
38	157	898
192	175	820
206	23	969
70	60	719
97	23	870
201	49	922
147	49	905
197	150	739
64	135	912
187	23	891
2	3	848
135	157	778
18	5	833
153	29	986
153	114	817
85	191	787
166	162	774
131	120	857
186	175	820
18	149	875
38	136	971
134	76	858
153	50	986
60	5	850
55	166	989
50	149	855
129	100	850
174	34	870
36	66	991
91	23	921
156	200	902
24	149	871
132	53	876
128	100	815
146	162	988
107	22	870
114	180	834
203	60	835
198	80	967
43	52	912
44	174	870
38	93	983
179	136	957
164	56	849
38	184	831
146	133	875
218	53	736
14	126	768
146	84	990
200	111	915
84	145	855
3	177	870
84	46	993
84	163	917
120	205	913
164	69	917
85	204	851
74	194	981
147	86	786
178	132	858
166	142	818
51	37	749
55	157	944
93	123	987
192	66	849
111	149	817
204	207	983
91	61	909
115	52	942
65	24	961
200	207	986
158	3	870
146	110	982
51	176	869
74	111	730
143	134	832
166	145	921
137	217	921
110	149	749
31	144	878
49	149	952
169	149	911
38	149	855
5	162	856
106	150	711
17	19	870
81	36	991
37	22	872
81	173	894
17	182	847
109	149	952
44	86	870
64	109	992
57	178	892
154	159	702
44	75	841
63	80	978
2	61	923
178	160	862
114	194	990
24	53	859
91	177	875
173	105	957
201	109	922
197	2	846
107	177	870
199	58	752
91	24	904
162	46	991
44	109	833
78	62	857
24	89	838
57	3	838
44	91	870
80	96	983
186	190	820
109	123	752
50	157	915
38	49	822
81	118	937
165	159	727
186	150	858
44	2	876
107	126	870
156	29	934
203	24	870
199	138	845
74	204	721
213	70	867
192	177	867
110	1	984
78	174	834
80	86	949
97	138	772
44	114	870
131	115	892
169	162	976
38	179	987
81	56	947
81	129	916
191	111	856
215	1	748
36	100	929
133	1	890
128	192	782
107	158	870
204	194	855
50	133	870
81	22	947
81	58	905
191	86	776
82	8	816
179	153	983
96	149	867
217	168	778
74	123	763
53	86	711
71	22	870
153	90	983
44	61	868
96	1	985
82	202	985
96	111	976
205	86	709
153	64	856
132	44	872
110	109	753
60	61	873
4	10	903
109	91	795
132	195	870
214	33	941
166	207	764
207	46	988
194	23	846
205	189	752
29	136	911
215	90	883
102	107	870
206	24	811
102	187	837
203	83	976
57	158	751
2	91	966
38	198	982
50	96	981
57	37	990
192	129	801
187	34	857
213	52	959
60	154	849
44	59	889
14	65	961
181	164	886
74	113	870
49	117	854
106	148	791
58	152	752
64	142	940
197	24	841
179	191	981
80	5	939
84	204	985
136	121	896
84	90	984
128	175	759
120	60	870
56	134	870
94	39	734
155	83	870
18	46	990
47	152	980
214	100	713
60	182	870
198	86	748
164	217	968
145	24	878
191	46	980
167	111	754
55	84	905
156	85	738
56	150	764
49	93	833
63	204	983
217	211	742
154	75	941
7	170	875
97	36	958
85	123	892
181	215	880
17	134	892
200	180	984
44	134	858
26	105	961
80	34	976
36	175	977
132	158	870
26	164	935
80	162	986
160	37	990
5	34	994
112	188	931
47	217	778
145	41	720
132	140	815
124	50	852
213	60	861
92	102	994
104	121	990
82	17	898
144	23	825
196	145	828
29	198	977
205	76	870
179	90	984
80	99	787
57	31	861
18	16	854
93	80	983
80	149	953
198	12	975
93	135	752
128	79	846
174	23	850
145	86	990
5	1	919
189	212	728
84	133	872
44	71	835
51	177	870
153	46	981
38	135	745
24	52	931
131	212	811
199	125	800
112	159	860
146	142	977
102	150	870
51	13	952
160	213	898
17	203	838
113	5	845
113	44	870
82	22	944
179	111	981
204	12	961
199	79	866
122	36	792
76	75	841
113	49	859
132	24	870
117	188	886
131	91	870
102	3	870
28	182	720
213	126	793
191	162	971
97	52	852
186	36	929
217	11	761
65	212	738
169	194	926
186	118	777
201	16	922
163	162	888
55	110	875
205	91	870
146	157	940
181	50	907
2	129	967
17	176	847
102	112	870
158	42	791
50	194	814
12	50	986
169	38	989
12	86	884
102	115	870
38	29	988
97	8	905
164	100	933
2	189	733
166	93	764
185	33	955
204	86	812
107	65	838
174	76	870
196	83	870
97	177	873
215	123	876
185	154	702
31	60	870
204	149	819
207	133	875
110	86	704
195	22	870
85	198	865
115	140	895
118	152	755
204	80	972
44	141	789
54	166	794
115	31	870
133	111	849
60	56	878
51	56	875
208	144	888
179	12	985
131	60	870
136	46	913
68	162	883
48	141	818
102	61	916
24	19	968
64	96	867
160	91	784
38	109	822
150	175	888
160	205	789
166	50	864
169	156	861
38	50	991
29	90	990
110	12	974
62	196	849
144	60	870
63	123	982
51	170	976
81	168	947
29	46	988
112	22	802
198	191	947
49	157	853
150	24	870
81	47	947
38	9	864
102	170	941
17	31	870
132	135	872
206	75	787
67	16	728
49	76	833
179	162	982
126	42	860
206	31	867
184	98	727
38	84	984
192	168	940
49	145	920
103	175	912
82	31	870
97	22	998
57	82	892
53	149	786
114	123	819
29	142	981
105	164	994
199	165	755
201	162	731
180	149	828
26	152	778
49	123	752
47	211	940
63	133	871
64	90	843
86	98	980
103	199	800
55	204	894
93	191	982
74	162	800
169	180	985
116	86	722
114	200	915
110	64	814
99	149	940
57	140	953
170	177	892
107	24	870
118	66	755
136	96	870
198	123	982
103	33	925
184	1	886
131	31	870
113	86	870
51	52	905
5	76	870
205	23	870
56	91	972
165	79	828
81	79	896
178	104	983
57	17	917
29	162	976
60	19	870
179	1	979
114	157	986
102	25	881
132	97	873
36	79	929
59	76	889
112	214	816
93	16	752
205	158	885
102	97	895
113	149	870
132	31	876
131	37	915
143	60	920
146	163	928
2	79	833
198	180	960
44	24	932
94	188	994
113	114	870
201	136	870
132	23	870
143	157	839
195	174	852
65	3	838
194	180	807
23	212	915
14	189	918
205	43	943
95	73	942
146	123	986
74	155	870
82	104	983
26	36	935
201	198	840
169	114	916
57	102	933
84	93	989
146	85	870
179	200	988
17	170	873
174	27	950
93	145	879
2	22	956
48	150	719
131	19	859
181	121	702
166	64	999
35	164	849
166	1	864
120	91	847
102	130	816
217	66	800
3	22	870
125	66	800
85	200	870
207	1	987
164	33	741
63	110	977
64	184	886
80	157	960
118	214	756
12	80	977
199	219	739
178	14	860
131	177	879
8	5	774
102	22	890
18	163	924
80	46	988
29	123	981
57	60	907
146	179	977
180	46	975
204	50	985
84	68	764
55	34	992
145	207	879
55	99	884
48	143	888
56	66	961
71	52	879
44	3	870
44	212	886
67	135	728
179	68	729
146	191	977
64	145	981
196	23	847
14	7	751
160	51	732
97	91	971
108	59	737
7	52	901
115	161	766
135	75	771
74	38	778
84	114	819
14	177	980
169	179	987
123	1	987
205	212	905
146	114	875
132	3	868
126	37	870
195	134	916
57	97	898
38	16	745
91	189	916
60	183	870
158	52	800
114	27	841
145	135	753
63	191	973
174	114	870
48	175	927
139	152	845
112	152	820
166	16	795
118	217	761
178	189	866
8	126	860
203	76	870
216	24	789
97	103	913
178	51	870
128	125	761
103	164	919
39	112	844
186	165	775
173	139	957
117	25	710
109	114	973
74	84	751
93	111	984
184	162	855
114	133	838
198	1	980
186	81	896
175	168	826
186	152	938
82	37	923
114	53	766
178	56	866
179	46	987
73	44	790
169	215	728
55	163	965
97	5	914
36	35	832
49	98	743
163	116	885
186	37	856
169	207	990
47	129	852
17	195	915
97	211	905
88	86	739
91	52	896
57	71	888
147	16	876
205	37	904
164	139	994
48	5	890
81	106	817
11	66	755
174	24	978
12	96	975
48	8	847
187	86	764
110	157	838
192	213	779
169	1	987
109	204	720
55	116	868
169	85	891
156	46	899
80	1	984
143	145	720
189	177	878
38	80	988
86	46	827
203	163	971
115	182	909
156	111	927
213	17	870
57	150	878
164	58	961
156	110	906
123	16	727
187	53	939
192	11	776
115	24	856
36	137	769
132	174	876
160	60	796
114	90	832
183	75	868
55	46	875
82	60	887
118	8	706
187	134	837
146	34	975
60	23	981
82	52	874
12	191	983
8	53	881
125	139	864
106	117	790
103	159	732
158	177	870
136	204	735
103	217	736
74	44	874
132	208	876
146	74	777
164	152	990
164	11	947
93	90	988
18	99	742
97	219	787
150	22	966
102	37	870
84	142	989
129	168	852
81	165	943
18	191	983
192	165	775
132	101	844
194	86	988
169	142	990
50	46	993
146	55	940
213	22	914
160	52	994
186	66	849
8	31	870
184	194	799
197	183	838
70	22	848
5	145	988
74	135	912
213	51	931
97	17	887
65	31	861
204	96	928
66	219	739
213	177	913
47	219	794
65	71	890
174	212	876
164	72	736
150	61	895
82	177	873
71	60	870
91	3	850
131	132	870
29	64	823
150	23	874
192	150	858
196	184	917
178	177	873
97	34	867
2	211	868
160	115	914
17	37	870
203	99	870
123	135	727
140	91	870
128	97	757
196	24	870
74	5	991
194	34	994
74	34	993
215	93	819
108	2	877
56	52	805
192	35	820
125	152	800
110	49	753
146	46	990
18	157	932
5	123	763
166	38	774
215	136	871
114	5	990
12	180	981
169	12	988
49	46	792
102	5	877
16	149	857
170	52	909
158	189	795
44	60	870
3	52	870
55	207	949
153	198	958
205	145	859
169	166	821
70	7	709
70	43	793
128	214	756
97	48	742
18	194	855
132	52	851
110	5	820
31	52	870
60	150	870
46	149	853
64	198	853
186	213	779
200	46	985
132	206	749
195	60	902
102	31	853
76	149	870
165	100	828
185	97	720
142	207	989
50	200	988
190	100	825
114	12	874
8	17	874
203	149	910
126	189	910
163	145	978
202	136	875
8	91	960
5	98	954
39	219	754
63	142	981
173	164	935
82	189	866
194	98	980
219	79	780
115	43	883
18	200	990
129	11	765
131	150	870
27	212	895
166	86	966
5	50	874
36	58	958
195	76	858
205	150	870
84	149	819
29	93	989
183	76	885
114	16	960
188	219	926
136	191	870
133	90	870
127	164	725
110	191	983
153	111	980
179	123	972
205	183	806
198	50	973
18	90	988
78	5	870
2	52	825
113	76	870
198	207	971
0	75	948
86	16	875
156	1	934
31	37	852
165	66	755
132	61	875
192	22	991
213	91	937
91	150	957
65	91	945
179	142	988
150	212	845
195	189	883
176	170	981
71	140	849
64	162	878
8	33	949
125	79	797
93	1	987
206	91	873
68	46	737
166	18	819
109	16	968
185	219	847
63	93	982
199	35	702
126	60	751
103	36	919
73	76	790
213	13	728
81	175	930
196	8	744
146	145	906
85	29	915
110	29	985
125	211	742
156	179	844
64	12	876
51	22	873
63	153	975
86	34	994
97	81	955
142	133	853
36	47	937
28	170	706
184	93	799
215	204	810
132	2	870
217	100	742
156	123	884
204	1	978
48	44	907
115	213	880
179	84	986
81	152	963
8	150	967
64	93	889
186	2	868
7	177	867
92	106	783
127	139	733
97	75	726
17	61	870
145	1	945
191	207	982
120	174	814
18	135	830
82	51	870
39	25	732
83	149	979
2	75	893
110	194	703
213	176	888
38	191	977
78	102	851
74	83	945
29	191	974
86	207	883
84	34	913
17	2	870
64	86	979
198	200	977
6	163	957
63	84	979
112	21	791
169	63	980
64	200	943
92	5	739
97	134	839
17	150	870
146	86	855
38	111	951
157	99	949
190	8	735
97	56	996
61	76	868
128	185	727
31	2	850
153	68	764
173	199	778
114	80	954
186	217	742
102	188	896
48	135	908
150	100	842
143	1	728
7	43	769
160	13	735
150	211	858
203	157	976
119	105	782
176	37	769
36	125	968
94	106	713
115	158	914
14	205	798
160	2	705
132	177	870
125	165	761
192	37	856
137	125	923
105	175	936
56	177	870
57	160	961
63	90	986
85	80	882
9	1	703
63	68	815
153	123	981
109	50	817
186	199	849
82	182	873
194	83	875
58	175	813
128	112	721
217	79	742
149	90	834
96	86	849
108	194	730
80	163	941
190	66	702
85	153	870
38	204	978
125	100	797
109	145	920
200	1	980
2	183	877
14	213	898
45	83	871
64	191	868
102	21	703
169	93	990
186	58	815
131	213	711
12	194	841
190	79	825
49	91	784
74	49	712
97	205	870
71	17	928
128	164	947
128	159	728
78	154	771
192	47	940
82	71	732
31	19	861
93	157	911
186	115	849
74	80	899
166	80	864
170	43	724
207	162	981
110	133	870
174	60	854
80	133	870
183	212	870
134	22	870
78	8	863
81	148	718
80	50	988
23	101	870
140	56	865
124	207	830
204	142	977
136	162	870
215	111	701
163	34	980
81	211	896
107	31	907
110	123	984
142	46	989
5	41	718
81	219	859
49	50	817
158	182	985
46	1	991
97	33	925
23	27	809
22	101	831
131	17	870
110	93	982
25	148	936
114	149	990
166	46	727
76	99	813
150	53	802
153	194	874
49	5	965
112	150	760
57	13	947
179	180	970
163	86	945
187	143	799
125	175	812
98	76	840
49	203	739
55	38	924
74	1	876
166	179	764
164	168	937
209	86	760
103	66	800
60	22	931
114	34	993
174	19	922
11	159	730
110	46	982
64	111	863
105	129	796
68	111	899
188	25	999
131	24	753
12	111	927
95	48	982
186	125	742
56	100	940
126	182	980
85	133	970
179	207	986
115	101	758
133	180	787
118	36	947
120	43	870
194	46	703
94	112	713
93	18	990
114	145	985
49	188	724
198	96	955
28	125	903
84	136	872
186	11	777
105	217	864
125	168	778
187	195	836
84	1	986
8	47	744
20	212	786
191	1	981
199	11	755
24	61	856
7	189	802
80	135	860
185	112	827
122	164	793
81	192	896
178	71	730
12	162	973
38	12	981
119	164	812
206	2	859
111	90	971
107	61	809
128	199	755
136	90	871
74	16	899
17	158	904
123	46	990
122	214	701
31	101	870
142	86	880
197	75	858
202	121	990
98	83	792
163	123	896
82	115	876
36	168	937
109	111	768
102	195	972
146	80	985
38	142	982
84	191	983
119	139	782
5	163	980
97	150	963
136	200	870
127	173	925
91	75	926
162	133	877
22	177	870
186	8	726
64	136	815
110	114	749
140	52	985
175	79	820
102	24	870
64	157	948
132	187	848
202	104	991
81	66	963
86	99	945
203	145	976
157	83	979
166	200	743
163	111	897
63	64	707
55	64	990
166	5	986
97	77	831
110	96	986
52	189	957
84	49	747
76	101	931
65	61	813
97	112	852
218	149	865
123	149	819
110	200	986
186	177	867
115	3	870
49	204	720
49	18	808
217	139	864
126	177	870
219	152	854
158	22	934
112	91	767
91	77	747
102	205	870
113	109	859
48	24	899
92	219	783
205	182	847
215	198	909
21	75	746
109	80	825
205	19	870
124	46	796
97	65	898
24	59	856
181	147	887
166	111	727
158	60	896
194	162	896
163	149	940
179	198	976
109	22	762
110	204	958
31	170	870
135	86	880
131	126	870
97	100	920
86	10	888
29	180	980
198	114	800
64	133	840
147	215	703
218	67	769
151	210	726
24	27	968
74	109	712
97	66	987
85	114	833
50	34	956
37	212	742
82	121	986
48	125	711
34	99	965
123	86	866
8	22	859
156	133	918
202	72	931
80	16	860
187	98	951
5	207	888
217	165	761
115	189	930
17	43	932
51	91	876
151	24	802
132	134	870
40	24	897
199	139	845
2	177	834
187	184	957
31	189	879
32	83	785
84	29	989
115	56	799
178	126	870
184	34	878
48	53	899
84	64	864
107	23	870
128	152	755
80	123	986
81	11	937
31	158	884
170	140	870
35	211	820
65	126	924
74	116	769
131	23	752
31	182	707
166	96	761
176	189	974
136	133	949
126	3	870
205	22	870
109	162	871
209	53	781
190	192	820
115	177	986
49	60	873
132	150	870
8	76	942
170	126	870
78	187	870
76	22	875
171	111	754
60	86	864
102	8	897
106	21	791
114	98	890
97	101	861
66	79	866
186	170	842
112	165	721
64	1	920
120	150	847
97	60	870
145	3	784
18	96	980
60	76	870
60	52	870
169	123	987
49	22	762
102	189	832
110	198	968
153	133	884
71	37	805
199	105	845
150	79	842
38	194	814
146	16	817
137	129	750
[truncated: 758 more rows]
